# Supplementary material for: Prioritizing Therapeutic Targets for Interstitial Lung Disease: A Causal Mediation Analysis
Source: Research Square preprint supplement (doi:10.21203/rs.3.rs-8714555/v1), 2026-02-05
Supplement: Supplementary file 1 [file 416c91d742468d81d996351b.docx]

**Prioritizing Therapeutic Targets for Interstitial Lung Disease:**

**A Causal Mediation Analysis**

**Online Supplement**

Table of Contents

[Supplementary Methods 2](#_Toc218777149)

[Figure E1. STROBE diagram. 3](#_Toc218777150)

[Table E1. Source of individuals comprising discovery and validation cohorts 4](#_Toc218777151)

[Table E2. Evidence for association with human-based ILD survival and laboratory-based organ fibrosis among proteins evaluated. 5](#_Toc218777152)

[Table E3. Discovery cohort mediation analysis results 11](#_Toc218777153)

[Table E4. Validation cohort mediation analysis results 14](#_Toc218777154)

[Table E5. Pooled cohort (n=3135) mediation analysis results stratified by age 16](#_Toc218777155)

[Table E6. Pooled cohort (n=3135) mediation analysis results stratified by sex 17](#_Toc218777156)

[Table E7. Pooled cohort (n=3135) mediation analysis results stratified by race 18](#_Toc218777157)

[Table E8. Pooled cohort (n=3135) mediation analysis results stratified by baseline FVC 19](#_Toc218777158)

[Table E9. Pooled cohort (n=3135) mediation analysis results stratified by baseline DLCO 20](#_Toc218777159)

[Table E10. Pooled cohort (n=3135) mediation analysis results stratified by ILD subtype 21](#_Toc218777160)

[Table E11. Pooled cohort (n=3135) mediated effects using different protein categorization strategies 22](#_Toc218777161)

[Table E12. Pooled cohort (n=3135) mediated effects before and after excluding those for which DLCO decline was imputed 23](#_Toc218777162)

[Supplemental References 24](#_Toc218777163)

#

# **Supplementary Methods**

***A composite measure of lung function decline***

Baseline (range -6 to +3 months following blood draw) and follow-up measures (range 3-24 months following blood draw) of forced vital capacity (FVC) and diffusion capacity of the lung for carbon monoxide (DLCO) were collected. Subject-specific linear regression models were fit to estimate annualized decline in FVC and DLCO relative to baseline. Annualized decline in DLCO for those without follow-up DLCO measures was imputed by fitting a linear regression model with all outcome model covariates plus annualized FVC decline and using model fitted values to predict missing annualized DLCO decline. After establishing annualized decline in FVC and DLCO for all individuals, each measure of lung function decline was categorized as follows:

| FVC Decline | Score | n categorized (discovery cohort) | n categorized (validation cohort) |
| --- | --- | --- | --- |
| <5% | 0 | 1121 (57.1%) | 712 (60.8%) |
| 5-9.9% | 1 | 297 (15.1%) | 164 (14.0%) |
| 10-19.9% | 2 | 293 (14.9%) | 170 (14.5%) |
| >=20% | 3 | 252 (12.8%) | 126 (10.8%) |
| DLCO Decline | Score | n categorized (discovery cohort) | n categorized (validation cohort) |
| <15% | 0 | 1284 (65.4%) | 840 (71.7%) |
| 15-29.9% | 1 | 379 (19.3%) | 211 (18.0%) |
| 30-44.9% | 2 | 156 (8.0%) | 76 (6.5%) |
| >=45% | 3 | 144 (7.3%) | 45 (3.8%) |

FVC decline and DLCO decline scores were then summed to create a lung function decline score, with the following distribution:

| Lung function decline score | n categorized (discovery cohort) | n categorized (validation cohort) |
| --- | --- | --- |
| 0 | 889 (45.3%) | 622 (53.1%) |
| 1 | 350 (17.8%) | 197 (16.8%) |
| 2 | 264 (13.5%) | 120 (10.2%) |
| 3 | 200 (10.2%) | 101 (8.6%) |
| 4 | 96 (4.9%) | 54 (4.6%) |
| 5 | 84 (4.3%) | 44 (3.8%) |
| 6 | 80 (4.1%) | 34 (2.9%) |

**
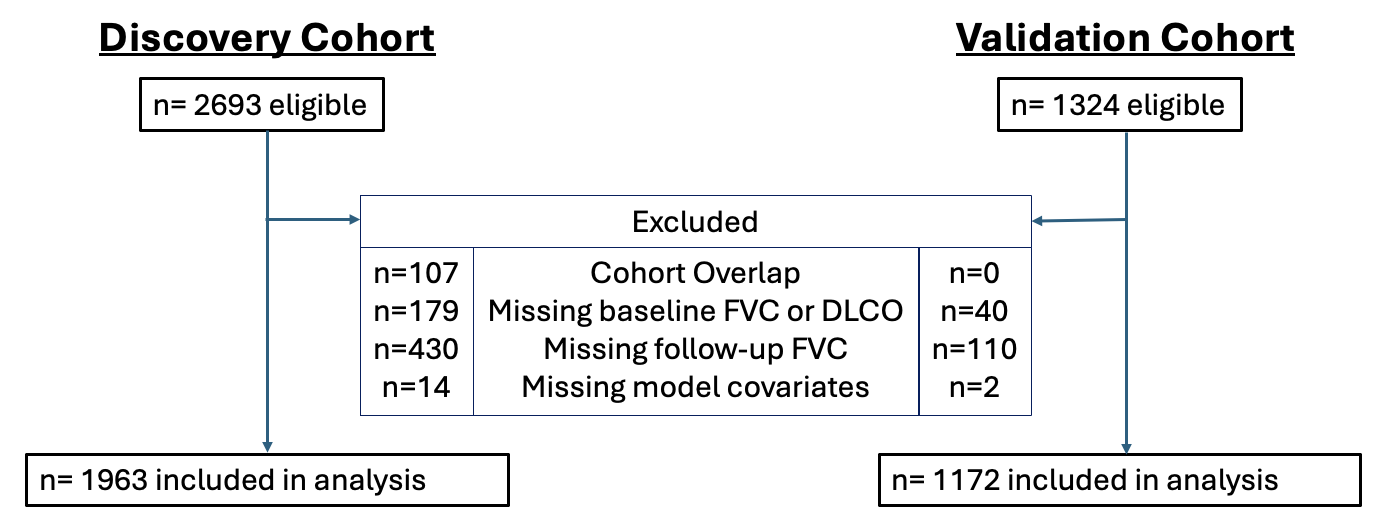
**

# **Figure E1.** STROBE diagram.

| **Table E1. Source of individuals comprising discovery and validation cohorts** | | |
| --- | --- | --- |
| **Site** | **n** | **Recruitment Dates** |
| **Discovery Cohort** | | |
| Pulmonary Fibrosis Foundation Patient Registry | 1044 | March 2016 – June 2018 |
| University of California - Davis | 326 | May 2016 – February 2021 |
| University of California - San Francisco | 220 | October 2004 – February 2019 |
| University of Chicago | 161 | March 2007 – July 2017 |
| University of Texas Southwestern Medical Center | 125 | March 2007 – August 2019 |
| University of Virginia | 87 | September 2018 – November 2021 |
| Total | 1963 |  |
| **Validation Cohort** | | |
| PROFILE cohort study | 336 | September 2010 – August 2017 |
| University of Michigan | 255 | March 2015 - November 2023 |
| University of British Columbia | 250 | August 2015 – October 2021 |
| University of Texas Southwestern Medical Center | 196 | February 2018 - November 2023 |
| University of Oslo | 86 | August 2021 - Augusst 2022 |
| University of California - Davis | 49 | September 2016 – September 2021 |
| Total | 1172 |  |
| Abbreviations: PROFILE = Prospective Observation of Fibrosis in the Lung Clinical Endpoints | | |

| **Table E2. Evidence for association with human-based ILD survival and laboratory-based organ fibrosis among proteins evaluated.** | | | |
| --- | --- | --- | --- |
| **Protein Symbol** | **Protein Name** | **Human-based ILD Survival Citation** | **Laboratory-based Organ Fibrosis Citation** |
| ACTA2 | Actin, aortic smooth muscle | (1) | (2) |
| ADAM12 | Disintegrin and metalloproteinase domain-containing protein 12 | (1) | (3) |
| ADAM22 | Disintegrin and metalloproteinase domain-containing protein 22 | (4) | NA |
| ADAMTS13 | A disintegrin and metalloproteinase with thrombospondin motifs 13 | (4, 5) | (6) |
| ADAMTSL4 | ADAMTS-like protein 4 | (1, 4) | NA |
| ADH4 | All-trans-retinol dehydrogenase [NAD(+)] ADH4 | (4) | (7) |
| AFM | Afamin | (4) | NA |
| AGER | Advanced glycosylation end product-specific receptor | (8) | (9) |
| AGR2 | Anterior gradient protein 2 homolog | (4) | (10) |
| AHSG | Alpha-2-HS-glycoprotein | (5) | NA |
| AREG | Amphiregulin | (1, 4) | (11) |
| ASAH2 | Neutral ceramidase | (4) | (12) |
| BCAT1 | Branched-chain-amino-acid aminotransferase, cytosolic | (1, 4) | NA |
| BHMT2 | S-methylmethionine--homocysteine S-methyltransferase BHMT2 | (4) | NA |
| BMP4 | Bone morphogenetic protein 4 | (4) | (13) |
| BPIFB1 | BPI fold-containing family B member 1 | (4) | NA |
| BRK1 | Protein BRICK1 | (4) | NA |
| CCL17 | C-C motif chemokine 17 | (4) | (14) |
| CCL18 | C-C motif chemokine 18 | (4) | (15) |
| CCL2 | C-C motif chemokine 2 | (16, 17) | (18) |
| CD1C | T-cell surface glycoprotein CD1c | (4) | NA |
| CD48 | CD48 antigen | (5) | NA |
| CD59 | CD59 glycoprotein | (19) | NA |
| CD80 | T-lymphocyte activation antigen CD80 | (4) | (20) |
| CDH5 | Cadherin-5 | (5) | NA |
| CEACAM6 | Carcinoembryonic antigen-related cell adhesion molecule 6 | (1, 4) | (21) |
| CES2 | Cocaine esterase | (4) | NA |
| CHAD | Chondroadherin | (1) | NA |
| CHGB | Secretogranin-1 | (4) | NA |
| CHI3L1 | Chitinase-3-like protein 1 | (22-25) | (26) |
| CHL1 | Neural cell adhesion molecule L1-like protein | (4) | NA |
| CHRDL2 | Chordin-like protein 2 | (4) | NA |
| CKB | Creatine kinase B-type | (1, 4) | NA |
| CLUL1 | Clusterin-like protein 1 | (4) | (27) |
| CNTN3 | Contactin-3 | (4) | NA |
| COL24A1 | Collagen alpha-1(XXIV) chain | (1, 4) | NA |
| CSF2 | Granulocyte-macrophage colony-stimulating factor | (4) | (28) |
| CSF3 | Granulocyte colony-stimulating factor | (5) | (29) |
| CSPG4 | Chondroitin sulfate proteoglycan 4 | (4) | (30) |
| CTHRC1 | Collagen triple helix repeat-containing protein 1 | (1, 4) | (31) |
| CTSL | Cathepsin L1 | (4) | (32) |
| CTSZ | Cathepsin Z | (5) | NA |
| CX3CL1 | Fractalkine | (33) | (34) |
| CXCL10 | C-X-C motif chemokine 10 | (35) | (36) |
| CXCL13 | C-X-C motif chemokine 13 | (4, 5, 22) | (37) |
| CXCL17 | C-X-C motif chemokine 17 | (4, 38) | (39) |
| CXCL9 | C-X-C motif chemokine 9 | (38) | (40) |
| DLK1 | Protein delta homolog 1 | (4) | (41) |
| DPT | Dermatopontin | (5) | (42) |
| DSC2 | Desmocollin-2 | (5) | (43) |
| DSCAM | Down syndrome cell adhesion molecule | (4) | NA |
| EDA2R | Tumor necrosis factor receptor superfamily member 27 | (1, 4) | NA |
| EDN1 | Endothelin-1 | (1) | (44) |
| ELN | Elastin | (4) | (45) |
| ENO3 | Beta-enolase | (4) | NA |
| EPHA1 | Ephrin type-A receptor 1 | (4) | NA |
| EPHB6 | Ephrin type-B receptor 6 | (5) | NA |
| ERBB3 | Receptor tyrosine-protein kinase erbB-3 | (5) | (46) |
| EVPL | Envoplakin | (4) | NA |
| FAP | Prolyl endopeptidase FAP | (4) | (47) |
| FASLG | Tumor necrosis factor ligand superfamily member 6 | (4, 5) | (48) |
| FCGR2A | Low affinity immunoglobulin gamma Fc region receptor II-a | (4) | NA |
| FCRL5 | Fc receptor-like protein 5 | (4) | NA |
| FCRL6 | Fc receptor-like protein 6 | (4) | NA |
| FCRLB | Fc receptor-like B | (4) | NA |
| FGL1 | Fibrinogen-like protein 1 | (4) | NA |
| FOLR1 | Folate receptor alpha | (4) | (49) |
| GALNT5 | Polypeptide N-acetylgalactosaminyltransferase 5 | (1, 4) | NA |
| GDF15 | Growth/differentiation factor 15 | (1, 4, 50) | (51) |
| GPHA2 | Glycoprotein hormone alpha-2 | (4) | NA |
| GSTA3 | Glutathione S-transferase A3 | (4) | (52) |
| ICAM1 | Intercellular adhesion molecule 1 | (4, 53-55) | (56) |
| ICAM5 | Intercellular adhesion molecule 5 | (4, 5) | NA |
| IFNGR2 | Interferon gamma receptor 2 | (5) | (57) |
| IGFBP1 | Insulin-like growth factor-binding protein 1 | (1, 4) | (58) |
| IGFBP2 | Insulin-like growth factor-binding protein 2 | (4) | (59) |
| IGFBP4 | Insulin-like growth factor-binding protein 4 | (4) | NA |
| IGLC2 | Immunoglobulin lambda constant 2 | (4) | NA |
| IGSF9 | Protein turtle homolog A | (4) | NA |
| IL10 | Interleukin-10 | (16) | (60) |
| IL1RL1 | Interleukin-1 receptor-like 1 | (1, 4) | (61) |
| IL2RA | Interleukin-2 receptor subunit alpha | (4, 62) | (63) |
| IL5RA | Interleukin-5 receptor subunit alpha | (4) | (64) |
| IL6 | Interleukin-6 | (4, 65, 66) | (67) |
| ITGB6 | Integrin beta-6 | (1, 4) | (68) |
| KLK4 | Kallikrein-4 | (4) | NA |
| KLK7 | Kallikrein-7 | (5) | NA |
| KLRB1 | Killer cell lectin-like receptor subfamily B member 1 | (4) | NA |
| KRT19 | Keratin, type I cytoskeletal 19 | (1, 4) | NA |
| L1CAM | Neural cell adhesion molecule L1 | (4) | NA |
| LAMP2 | Lysosome-associated membrane glycoprotein 2 | (4) | NA |
| LCP1 | Plastin-2 | (4) | (69) |
| LEG1 | Protein LEG1 homolog | (4) | NA |
| LEO1 | RNA polymerase-associated protein LEO1 | (4) | NA |
| LEP | Leptin | (4) | (70) |
| LIF | Leukemia inhibitory factor | (4) | (71) |
| LMOD1 | Leiomodin-1 | (1) | NA |
| LRG1 | Leucine-rich alpha-2-glycoprotein | (1, 4) | (72) |
| LRIG3 | Leucine-rich repeats and immunoglobulin-like domains protein 3 | (1) | NA |
| LTBP2 | Latent-transforming growth factor beta-binding protein 2 | (1, 4) | (73) |
| LY96 | Lymphocyte antigen 96 | (4) | NA |
| MAMDC2 | MAM domain-containing protein 2 | (1, 4) | NA |
| MATN3 | Matrilin-3 | (4) | NA |
| MBL2 | Mannose-binding protein C | (4) | NA |
| MEP1B | Meprin A subunit beta | (4) | (74) |
| MMP1 | Interstitial collagenase | (62) | (75) |
| MMP10 | Stromelysin-2 | (4) | (76) |
| MMP3 | Stromelysin-1 | (62) | (77) |
| MMP7 | Matrilysin | (4, 22, 53, 54, 78, 79) | (80) |
| MMP9 | Matrix metalloproteinase-9 | (62) | (81) |
| MRC1 | Macrophage mannose receptor 1 | (1, 4) | (82) |
| MSLN | Mesothelin | (4) | (83) |
| MSTN | Growth/differentiation factor 8 | (1, 4) | (84) |
| MUC16 | Mucin-16 | (4, 22, 24, 78) | (85) |
| MZB1 | Marginal zone B- and B1-cell-specific protein | (4) | (86) |
| NCAM2 | Neural cell adhesion molecule 2 | (4) | 44) |
| NCR3LG1 | Natural cytotoxicity triggering receptor 3 ligand 1 | (1) | NA |
| NELL2 | Protein kinase C-binding protein NELL2 | (4) | NA |
| NOS3 | Nitric oxide synthase, endothelial | (4) | (87) |
| NPL | N-acetylneuraminate lyase | (1) | NA |
| NPPB | Natriuretic peptides B | (4) | (88) |
| NPTX2 | Neuronal pentraxin-2 | (4) | NA |
| NRP2 | Neuropilin-2 | (4) | (89) |
| NT5C1A | Cytosolic 5'-nucleotidase 1A | (1) | NA |
| NTPROBNP | N-terminal prohormone of brain natriuretic peptide | (1, 4) | NA |
| NTRK2 | BDNF/NT-3 growth factors receptor | (4) | (90) |
| OCLN | Occludin | (4) | NA |
| OSMR | Oncostatin-M-specific receptor subunit beta | (1) | (91) |
| PIGR | Polymeric immunoglobulin receptor | (4) | NA |
| PLA2G10 | Group 10 secretory phospholipase A2 | (4) | (92) |
| PLAUR | Urokinase plasminogen activator surface receptor | (4) | (93) |
| POSTN | Periostin | (53, 94) (95) (96) | (97) |
| PPL | Periplakin | (1, 4) | (98) |
| PRSS22 | Brain-specific serine protease 4 | (4) | NA |
| PRSS8 | Prostasin | (4) | NA |
| PTGR1 | Prostaglandin reductase 1 | (4) | NA |
| PTK7 | Inactive tyrosine-protein kinase 7 | (4) | (99) |
| PTPRZ1 | Receptor-type tyrosine-protein phosphatase zeta | (4) | NA |
| RBFOX3 | RNA binding protein fox-1 homolog 3 | (1, 4) | NA |
| RET | Proto-oncogene tyrosine-protein kinase receptor Ret | (4) | NA |
| RGMA | Repulsive guidance molecule A | (5) | NA |
| RGMB | RGM domain family member B | (5) | NA |
| ROBO2 | Roundabout homolog 2 | (4) | NA |
| RSPO1 | R-spondin-1 | (4) | (100) |
| RSPO3 | R-spondin-3 | (4) | (101) |
| RTN4R | Reticulon-4 receptor | (4) | (102) |
| S100A12 | Protein S100-A12 | (54) | (103) |
| S100A4 | Protein S100-A4 | (104) | (105) |
| SCGB1A1 | Uteroglobin | (4) | (106) |
| SCGB3A2 | Secretoglobin family 3A member 2 | (4) | (107) |
| SDC1 | Syndecan-1 | (1, 4) | (108) |
| SDK2 | Protein sidekick-2 | (4) | NA |
| SERPINA11 | Serpin A11 | (4) | NA |
| SERPINA3 | Alpha-1-antichymotrypsin | (1, 4) | (87) |
| SEZ6L2 | Seizure 6-like protein 2 | (4) | NA |
| SFTPA2 | Pulmonary surfactant-associated protein A2 | (4, 79) | (109) |
| SFTPD | Pulmonary surfactant-associated protein D | (53, 78, 110) | (111) |
| SIGLEC8 | Sialic acid-binding Ig-like lectin 8 | (1) | NA |
| SLAMF7 | SLAM family member 7 | (4) | (112) |
| SPINT1 | Kunitz-type protease inhibitor 1 | (4) | (113) |
| SPON1 | Spondin-1 | (4, 5) | NA |
| SPP1 | Osteopontin | (4, 22, 53, 62) | (114) |
| SSC4D | Scavenger receptor cysteine-rich domain-containing group B protein | (4) | NA |
| TFF2 | Trefoil factor 2 | (1) | (115) |
| TGFBR1 | TGF-beta receptor type-1 | (1) | (116) |
| TGFBR3 | Transforming growth factor beta receptor type 3 | (5) | (117) |
| THBS2 | Thrombospondin-2 | (1, 4) | (118) |
| TIMD4 | T-cell immunoglobulin and mucin domain-containing protein 4 | (4) | (119) |
| TIMP2 | Metalloproteinase inhibitor 2 | (62) | NA |
| TIMP3 | Metalloproteinase inhibitor 3 | (62) | (120) |
| TNC | Tenascin | (4) | (121) |
| TNFRSF10B | Tumor necrosis factor receptor superfamily member 10B | (1) | (122) |
| TNFRSF6B | Tumor necrosis factor receptor superfamily member 6B | (4) | NA |
| TNFSF13B | Tumor necrosis factor ligand superfamily member 13B | (4) | NA |
| TXNDC15 | Thioredoxin domain-containing protein 15 | (4) | NA |
| TYRO3 | Tyrosine-protein kinase receptor TYRO3 | (5) | (123) |
| UPB1 | Beta-ureidopropionase | (4) | NA |
| VCAM1 | Vascular cell adhesion protein 1 | (22, 24, 54) | (124) |
| VCAN | Versican core protein | (4) | (125) |
| VEGFA | Vascular endothelial growth factor A | (126) | (127) |
| VEGFD | Vascular endothelial growth factor D | (4) | (128) |
| VSIG2 | V-set and immunoglobulin domain-containing protein 2 | (1) | NA |
| WFDC12 | WAP four-disulfide core domain protein 12 | (4) | NA |
| WFDC2 | WAP four-disulfide core domain protein 2 | (1, 4) | (129) |
| XG | Glycoprotein Xg | (4) | NA |

| **Table E3. Discovery cohort mediation analysis results** | | | | | | | | | | | | |
| --- | --- | --- | --- | --- | --- | --- | --- | --- | --- | --- | --- | --- |
| **Protein** | **Total Effect** | | | | **Natural Indirect Effect** | | | | **Natural Direct Effect** | | | |
| **Coefficient** | **95% CI Low** | **95% CI High** | **FDR p-value** | **Coefficient** | **95% CI Low** | **95% CI High** | **FDR p-value** | **Coefficient** | **95% CI Low** | **95% CI High** | **FDR p-value** |
| ACTA2 | -0.66 | -1.85 | 0.54 | 3.17E-01 | NA | NA | NA | NA | NA | NA | NA | NA |
| ADAM12 | -1.32 | -2.45 | -0.19 | 3.49E-02 | 0.07 | -0.46 | 0.61 | 7.99E-01 | -1.39 | -2.41 | -0.37 | 1.59E-02 |
| ADAMTS13 | 0.83 | -0.31 | 1.98 | 1.95E-01 | NA | NA | NA | NA | NA | NA | NA | NA |
| ADH4 | 2.05 | 0.93 | 3.17 | 9.12E-04 | 0.63 | 0.15 | 1.10 | 1.69E-02 | 1.43 | 0.37 | 2.49 | 1.74E-02 |
| AGER | 0.40 | -0.86 | 1.65 | 5.63E-01 | NA | NA | NA | NA | NA | NA | NA | NA |
| AGR2 | -1.65 | -2.77 | -0.53 | 7.56E-03 | -0.75 | -1.30 | -0.20 | 1.37E-02 | -0.90 | -1.85 | 0.06 | 7.73E-02 |
| AREG | -4.95 | -6.12 | -3.78 | 0.00E+00 | -2.65 | -3.45 | -1.85 | 7.02E-09 | -2.30 | -3.33 | -1.26 | 4.56E-04 |
| ASAH2 | 2.40 | 1.28 | 3.52 | 1.42E-04 | 0.99 | 0.49 | 1.48 | 6.45E-04 | 1.41 | 0.30 | 2.53 | 2.45E-02 |
| BMP4 | -1.16 | -2.27 | -0.05 | 6.11E-02 | NA | NA | NA | NA | NA | NA | NA | NA |
| CCL17 | -1.37 | -2.50 | -0.24 | 2.80E-02 | -0.81 | -1.39 | -0.23 | 1.25E-02 | -0.56 | -1.52 | 0.41 | 2.58E-01 |
| CCL18 | -0.65 | -1.76 | 0.46 | 2.90E-01 | NA | NA | NA | NA | NA | NA | NA | NA |
| CCL2 | -0.26 | -1.39 | 0.88 | 6.80E-01 | NA | NA | NA | NA | NA | NA | NA | NA |
| CD80 | -0.94 | -2.02 | 0.13 | 1.19E-01 | NA | NA | NA | NA | NA | NA | NA | NA |
| CEACAM6 | -4.05 | -5.19 | -2.91 | 5.61E-11 | -2.16 | -2.93 | -1.39 | 6.03E-07 | -1.89 | -2.85 | -0.93 | 9.50E-04 |
| CHI3L1 | -0.50 | -1.62 | 0.62 | 4.13E-01 | NA | NA | NA | NA | NA | NA | NA | NA |
| CLUL1 | -2.60 | -3.70 | -1.49 | 2.61E-05 | -0.75 | -1.39 | -0.11 | 3.06E-02 | -1.85 | -2.83 | -0.86 | 1.08E-03 |
| CSF2 | -2.93 | -4.03 | -1.84 | 1.94E-06 | -1.12 | -1.73 | -0.51 | 1.85E-03 | -1.81 | -2.76 | -0.86 | 1.12E-03 |
| CSF3 | 0.15 | -1.10 | 1.39 | 8.18E-01 | NA | NA | NA | NA | NA | NA | NA | NA |
| CSPG4 | -1.62 | -2.76 | -0.49 | 9.02E-03 | -0.34 | -0.91 | 0.22 | 2.49E-01 | -1.28 | -2.26 | -0.29 | 2.18E-02 |
| CTHRC1 | -2.41 | -3.57 | -1.24 | 2.38E-04 | -0.71 | -1.28 | -0.15 | 2.15E-02 | -1.70 | -2.71 | -0.68 | 3.16E-03 |
| CTSL | -1.80 | -2.91 | -0.69 | 3.30E-03 | -0.47 | -1.02 | 0.07 | 1.13E-01 | -1.33 | -2.30 | -0.36 | 1.60E-02 |
| CX3CL1 | -0.59 | -1.73 | 0.55 | 3.46E-01 | NA | NA | NA | NA | NA | NA | NA | NA |
| CXCL10 | 1.41 | 0.32 | 2.51 | 1.94E-02 | 0.28 | -0.10 | 0.66 | 1.76E-01 | 1.14 | 0.13 | 2.14 | 3.93E-02 |
| CXCL13 | -2.08 | -3.21 | -0.94 | 9.22E-04 | -1.02 | -1.64 | -0.39 | 3.97E-03 | -1.06 | -2.05 | -0.08 | 4.87E-02 |
| CXCL17 | -2.51 | -3.79 | -1.24 | 4.28E-04 | -0.81 | -1.46 | -0.16 | 2.16E-02 | -1.70 | -2.81 | -0.59 | 7.29E-03 |
| CXCL9 | 0.78 | -0.36 | 1.92 | 2.15E-01 | NA | NA | NA | NA | NA | NA | NA | NA |
| DLK1 | 1.72 | 0.57 | 2.86 | 6.78E-03 | 0.55 | 0.18 | 0.93 | 8.33E-03 | 1.17 | 0.07 | 2.26 | 4.91E-02 |
| DPT | 0.86 | -0.29 | 2.01 | 1.85E-01 | NA | NA | NA | NA | NA | NA | NA | NA |
| DSC2 | -0.78 | -1.94 | 0.38 | 2.28E-01 | NA | NA | NA | NA | NA | NA | NA | NA |
| EDN1 | -1.63 | -2.79 | -0.48 | 1.00E-02 | -0.36 | -0.89 | 0.18 | 2.12E-01 | -1.27 | -2.28 | -0.27 | 2.38E-02 |
| ELN | -1.43 | -2.77 | -0.09 | 5.36E-02 | NA | NA | NA | NA | NA | NA | NA | NA |
| ERBB3 | 0.62 | -0.57 | 1.82 | 3.45E-01 | NA | NA | NA | NA | NA | NA | NA | NA |
| FAP | 1.58 | 0.49 | 2.67 | 8.41E-03 | 0.75 | 0.30 | 1.20 | 3.51E-03 | 0.83 | -0.24 | 1.89 | 1.35E-01 |
| FASLG | 2.53 | 1.35 | 3.71 | 1.43E-04 | 0.77 | 0.31 | 1.23 | 3.55E-03 | 1.76 | 0.64 | 2.88 | 5.83E-03 |
| FOLR1 | -2.75 | -3.89 | -1.62 | 1.48E-05 | -0.93 | -1.52 | -0.35 | 4.49E-03 | -1.82 | -2.78 | -0.86 | 1.07E-03 |
| GDF15 | -3.50 | -4.66 | -2.34 | 5.82E-08 | -1.59 | -2.30 | -0.88 | 1.14E-04 | -1.91 | -2.92 | -0.91 | 9.87E-04 |
| GSTA3 | 2.15 | 1.04 | 3.27 | 5.52E-04 | 0.53 | 0.12 | 0.94 | 1.90E-02 | 1.62 | 0.56 | 2.68 | 7.00E-03 |
| ICAM1 | -2.68 | -3.76 | -1.60 | 8.32E-06 | -1.23 | -1.90 | -0.55 | 1.84E-03 | -1.45 | -2.41 | -0.50 | 6.96E-03 |
| IFNGR2 | 0.13 | -0.95 | 1.22 | 8.18E-01 | NA | NA | NA | NA | NA | NA | NA | NA |
| IGFBP1 | -2.14 | -3.29 | -0.99 | 8.69E-04 | -0.66 | -1.22 | -0.10 | 2.95E-02 | -1.48 | -2.50 | -0.45 | 1.11E-02 |
| IGFBP2 | -1.86 | -3.05 | -0.66 | 4.97E-03 | -0.61 | -1.19 | -0.03 | 5.37E-02 | -1.25 | -2.31 | -0.18 | 3.50E-02 |
| IL10 | -0.64 | -1.79 | 0.51 | 3.21E-01 | NA | NA | NA | NA | NA | NA | NA | NA |
| IL1RL1 | -2.31 | -3.41 | -1.21 | 1.92E-04 | -1.06 | -1.68 | -0.43 | 3.35E-03 | -1.25 | -2.21 | -0.29 | 2.13E-02 |
| IL2RA | -1.61 | -2.73 | -0.50 | 8.63E-03 | -0.68 | -1.22 | -0.13 | 2.24E-02 | -0.93 | -1.90 | 0.03 | 7.16E-02 |
| IL5RA | -1.84 | -2.98 | -0.69 | 3.70E-03 | -1.06 | -1.71 | -0.41 | 3.80E-03 | -0.78 | -1.78 | 0.22 | 1.34E-01 |
| IL6 | -2.24 | -3.37 | -1.11 | 3.93E-04 | -0.58 | -1.14 | -0.01 | 6.10E-02 | -1.66 | -2.65 | -0.67 | 3.41E-03 |
| ITGB6 | -4.61 | -5.81 | -3.40 | 2.17E-12 | -2.51 | -3.33 | -1.69 | 6.22E-08 | -2.09 | -3.16 | -1.02 | 9.16E-04 |
| LCP1 | -1.32 | -2.46 | -0.19 | 3.55E-02 | -0.65 | -1.16 | -0.15 | 1.85E-02 | -0.67 | -1.64 | 0.30 | 1.80E-01 |
| LEP | 1.81 | 0.33 | 3.28 | 2.74E-02 | 0.42 | -0.11 | 0.94 | 1.45E-01 | 1.39 | 0.03 | 2.75 | 5.86E-02 |
| LIF | -1.27 | -2.38 | -0.16 | 3.82E-02 | -0.55 | -1.07 | -0.02 | 5.52E-02 | -0.72 | -1.69 | 0.26 | 1.54E-01 |
| LRG1 | -1.78 | -2.94 | -0.61 | 6.13E-03 | -0.66 | -1.22 | -0.11 | 2.88E-02 | -1.11 | -2.15 | -0.08 | 4.77E-02 |
| LTBP2 | -4.56 | -5.77 | -3.34 | 5.06E-12 | -2.32 | -3.10 | -1.53 | 1.11E-07 | -2.24 | -3.30 | -1.18 | 5.82E-04 |
| MEP1B | 1.99 | 0.92 | 3.06 | 8.97E-04 | 0.23 | -0.17 | 0.64 | 2.75E-01 | 1.75 | 0.75 | 2.75 | 2.17E-03 |
| MMP1 | -1.06 | -2.17 | 0.05 | 8.64E-02 | NA | NA | NA | NA |  |  |  |  |
| MMP10 | -2.23 | -3.43 | -1.03 | 8.50E-04 | -1.25 | -1.90 | -0.59 | 1.08E-03 | -0.98 | -2.02 | 0.05 | 7.52E-02 |
| MMP3 | -0.87 | -2.05 | 0.30 | 1.90E-01 | NA | NA | NA | NA | NA | NA | NA | NA |
| MMP7 | -2.73 | -3.92 | -1.54 | 4.08E-05 | -0.75 | -1.35 | -0.16 | 2.10E-02 | -1.97 | -3.02 | -0.93 | 9.53E-04 |
| MMP9 | -0.82 | -1.96 | 0.32 | 1.94E-01 | NA | NA | NA | NA | NA | NA | NA | NA |
| MRC1 | -2.11 | -3.23 | -0.98 | 8.58E-04 | -0.99 | -1.59 | -0.39 | 3.61E-03 | -1.12 | -2.08 | -0.15 | 3.80E-02 |
| MSLN | -1.42 | -2.51 | -0.33 | 1.81E-02 | -0.39 | -0.90 | 0.13 | 1.70E-01 | -1.04 | -1.99 | -0.09 | 4.61E-02 |
| MSTN | 1.87 | 0.72 | 3.02 | 3.26E-03 | 0.63 | 0.17 | 1.08 | 1.33E-02 | 1.24 | 0.15 | 2.34 | 3.92E-02 |
| MUC16 | -2.03 | -3.13 | -0.93 | 8.59E-04 | -0.05 | -0.62 | 0.53 | 8.73E-01 | -1.98 | -2.96 | -1.01 | 9.24E-04 |
| MZB1 | -1.91 | -3.03 | -0.79 | 2.08E-03 | -1.03 | -1.62 | -0.45 | 2.49E-03 | -0.88 | -1.87 | 0.11 | 9.30E-02 |
| NCAM2 | -2.46 | -3.56 | -1.37 | 5.86E-05 | -0.51 | -1.16 | 0.13 | 1.45E-01 | -1.95 | -2.94 | -0.97 | 9.60E-04 |
| NOS3 | -1.85 | -3.01 | -0.70 | 3.75E-03 | -0.99 | -1.59 | -0.40 | 3.60E-03 | -0.86 | -1.87 | 0.14 | 1.04E-01 |
| NPPB | -1.47 | -2.57 | -0.37 | 1.59E-02 | -0.32 | -0.80 | 0.16 | 2.16E-01 | -1.15 | -2.13 | -0.17 | 3.59E-02 |
| NRP2 | -2.26 | -3.36 | -1.16 | 2.47E-04 | -0.58 | -1.19 | 0.03 | 7.90E-02 | -1.68 | -2.63 | -0.73 | 2.13E-03 |
| NTRK2 | 2.00 | 0.87 | 3.14 | 1.36E-03 | 0.65 | 0.25 | 1.05 | 3.95E-03 | 1.36 | 0.26 | 2.45 | 2.74E-02 |
| OSMR | -1.16 | -2.30 | -0.01 | 7.12E-02 | NA | NA | NA | NA | NA | NA | NA | NA |
| PLA2G10 | -2.27 | -3.40 | -1.15 | 2.93E-04 | -1.19 | -1.87 | -0.50 | 3.01E-03 | -1.09 | -2.06 | -0.12 | 4.05E-02 |
| PLAUR | -1.66 | -2.75 | -0.56 | 6.40E-03 | -0.84 | -1.37 | -0.30 | 4.95E-03 | -0.82 | -1.79 | 0.15 | 1.05E-01 |
| POSTN | -2.30 | -3.44 | -1.17 | 2.93E-04 | -0.53 | -1.09 | 0.04 | 8.66E-02 | -1.78 | -2.75 | -0.81 | 1.38E-03 |
| PPL | -2.91 | -4.01 | -1.80 | 2.69E-06 | -1.00 | -1.58 | -0.41 | 3.07E-03 | -1.91 | -2.87 | -0.95 | 1.03E-03 |
| PTK7 | -1.97 | -3.09 | -0.86 | 1.38E-03 | -0.34 | -0.90 | 0.21 | 2.49E-01 | -1.63 | -2.60 | -0.65 | 3.31E-03 |
| RSPO1 | -1.03 | -2.24 | 0.17 | 1.28E-01 | NA | NA | NA | NA | NA | NA | NA | NA |
| RSPO3 | -0.55 | -1.79 | 0.68 | 4.11E-01 | NA | NA | NA | NA | NA | NA | NA | NA |
| RTN4R | 1.81 | 0.60 | 3.02 | 6.91E-03 | 0.61 | 0.16 | 1.05 | 1.41E-02 | 1.21 | 0.08 | 2.34 | 4.81E-02 |
| S100A12 | -0.91 | -2.01 | 0.18 | 1.37E-01 | NA | NA | NA | NA | NA | NA | NA | NA |
| S100A4 | 1.38 | 0.21 | 2.55 | 3.33E-02 | 0.38 | -0.08 | 0.84 | 1.33E-01 | 1.00 | -0.08 | 2.07 | 7.94E-02 |
| SCGB1A1 | -1.03 | -2.28 | 0.22 | 1.41E-01 | NA | NA | NA | NA | NA | NA | NA | NA |
| SCGB3A2 | -2.30 | -3.48 | -1.12 | 5.06E-04 | -1.32 | -1.95 | -0.69 | 2.70E-04 | -0.98 | -1.99 | 0.03 | 7.13E-02 |
| SDC1 | -2.07 | -3.19 | -0.96 | 8.76E-04 | -0.89 | -1.45 | -0.32 | 4.95E-03 | -1.19 | -2.16 | -0.21 | 2.97E-02 |
| SERPINA3 | -3.18 | -4.33 | -2.04 | 6.94E-07 | -0.78 | -1.39 | -0.17 | 2.14E-02 | -2.40 | -3.38 | -1.42 | 1.06E-04 |
| SFTPA2 | -2.91 | -4.01 | -1.80 | 2.52E-06 | -1.67 | -2.31 | -1.02 | 4.93E-06 | -1.24 | -2.20 | -0.28 | 2.18E-02 |
| SFTPD | -1.91 | -3.04 | -0.79 | 2.03E-03 | -1.08 | -1.78 | -0.38 | 5.46E-03 | -0.84 | -1.81 | 0.14 | 1.02E-01 |
| SLAMF7 | -0.65 | -1.76 | 0.46 | 2.93E-01 | NA | NA | NA | NA | NA | NA | NA | NA |
| SPINT1 | -4.33 | -5.45 | -3.22 | 1.51E-12 | -2.15 | -2.87 | -1.42 | 1.31E-07 | -2.19 | -3.19 | -1.19 | 3.81E-04 |
| SPP1 | -0.81 | -1.91 | 0.30 | 1.92E-01 | NA | NA | NA | NA | NA | NA | NA | NA |
| TFF2 | -1.40 | -2.54 | -0.26 | 2.70E-02 | -0.22 | -0.70 | 0.27 | 3.96E-01 | -1.18 | -2.21 | -0.15 | 3.91E-02 |
| TGFBR1 | -0.65 | -1.72 | 0.43 | 2.82E-01 | NA | NA | NA | NA | NA | NA | NA | NA |
| TGFBR3 | 0.89 | -0.21 | 1.98 | 1.51E-01 | NA | NA | NA | NA | NA | NA | NA | NA |
| THBS2 | -2.71 | -3.78 | -1.64 | 5.99E-06 | -0.88 | -1.49 | -0.27 | 1.01E-02 | -1.83 | -2.77 | -0.89 | 9.31E-04 |
| TIMD4 | -0.46 | -1.60 | 0.69 | 4.63E-01 | NA | NA | NA | NA | NA | NA | NA | NA |
| TIMP3 | -0.23 | -1.31 | 0.85 | 6.95E-01 | NA | NA | NA | NA |  |  |  |  |
| TNC | -2.00 | -3.08 | -0.91 | 9.02E-04 | -1.05 | -1.67 | -0.44 | 3.04E-03 | -0.94 | -1.88 | 0.00 | 6.32E-02 |
| TNFRSF10B | -2.77 | -3.95 | -1.58 | 2.96E-05 | -1.19 | -1.90 | -0.48 | 3.53E-03 | -1.58 | -2.61 | -0.54 | 6.92E-03 |
| TYRO3 | 1.01 | -0.09 | 2.12 | 1.02E-01 | NA | NA | NA | NA | NA | NA | NA | NA |
| VCAM1 | -0.32 | -1.42 | 0.78 | 5.92E-01 | NA | NA | NA | NA | NA | NA | NA | NA |
| VCAN | -0.79 | -1.91 | 0.32 | 2.02E-01 | NA | NA | NA | NA | NA | NA | NA | NA |
| VEGFA | -0.56 | -1.67 | 0.55 | 3.53E-01 | NA | NA | NA | NA | NA | NA | NA | NA |
| VEGFD | -1.64 | -2.78 | -0.51 | 8.52E-03 | -0.26 | -0.74 | 0.23 | 3.17E-01 | -1.39 | -2.39 | -0.39 | 1.51E-02 |
| WFDC2 | -3.25 | -4.47 | -2.02 | 2.26E-06 | -0.81 | -2.16 | -0.82 | 1.19E-04 | -1.76 | -2.80 | -0.71 | 3.36E-03 |
| Abbreviations: CI = confidence interval; FDR = false discovery rate. Protein abbreviations are shown in Table E2. | | | | | | | | | | | | |
| Total effect coefficient represents the difference in restricted mean survival time (months) for those in the tenth decile of protein relative abundance compared to the first decile. Natural indirect effect coefficient represents the difference in survival between these groups due to declining lung function, while natural direct effect coefficient represents the difference in survival between these groups due to an alternate pathway. | | | | | | | | | | | | |

| **Table E4. Validation cohort mediation analysis results** | | | | | | | | | | | | |
| --- | --- | --- | --- | --- | --- | --- | --- | --- | --- | --- | --- | --- |
| **Protein** | **Total Effect** | | | | **Natural Indirect Effect** | | | | **Natural Direct Effect** | | | |
| **Coefficient** | **95% CI Low** | **95% CI High** | **FDR p-value** | **Coefficient** | **95% CI Low** | **95% CI High** | **FDR p-value** | **Coefficient** | **95% CI Low** | **95% CI High** | **FDR p-value** |
| ADH4 | 2.08 | 0.86 | 3.30 | 5.63E-03 | 0.42 | 0.02 | 0.83 | 7.95E-02 | 1.66 | 0.43 | 2.89 | 0.03 |
| AGR2 | -1.03 | -2.32 | 0.26 | 1.56E-01 | NA | NA | NA | NA | NA | NA | NA | NA |
| AREG | -3.99 | -5.17 | -2.82 | 1.20E-09 | -2.24 | -3.14 | -1.35 | 2.16E-05 | -1.75 | -2.85 | -0.65 | 0.01 |
| ASAH2 | 1.28 | 0.11 | 2.46 | 5.30E-02 | NA | NA | NA | NA | NA | NA | NA | NA |
| CCL17 | -1.51 | -2.86 | -0.16 | 5.16E-02 | NA | NA | NA | NA | NA | NA | NA | NA |
| CEACAM6 | -1.50 | -2.76 | -0.24 | 4.12E-02 | -0.83 | -1.58 | -0.08 | 6.99E-02 | -0.67 | -1.82 | 0.48 | 0.30 |
| CLUL1 | -0.83 | -1.98 | 0.32 | 1.98E-01 | NA | NA | NA | NA | NA | NA | NA | NA |
| CSF2 | -2.09 | -3.25 | -0.94 | 3.49E-03 | -1.06 | -1.75 | -0.37 | 1.22E-02 | -1.03 | -2.07 | 0.01 | 0.10 |
| CTHRC1 | -1.59 | -2.87 | -0.31 | 4.60E-02 | -0.26 | -0.95 | 0.42 | 5.15E-01 | -1.33 | -2.47 | -0.19 | 0.06 |
| CXCL13 | -0.90 | -2.14 | 0.34 | 1.92E-01 | NA | NA | NA | NA | NA | NA | NA | NA |
| CXCL17 | -0.53 | -1.82 | 0.76 | 4.46E-01 | NA | NA | NA | NA | NA | NA | NA | NA |
| DLK1 | 1.59 | 0.42 | 2.77 | 3.78E-02 | 0.38 | -0.05 | 0.81 | 1.28E-01 | 1.21 | 0.07 | 2.36 | 0.08 |
| FAP | 1.42 | 0.26 | 2.58 | 3.96E-02 | 0.19 | -0.18 | 0.56 | 3.61E-01 | 1.23 | 0.12 | 2.33 | 0.07 |
| FASLG | 2.08 | 0.86 | 3.29 | 6.33E-03 | 0.16 | -0.09 | 0.41 | 2.55E-01 | 1.92 | 0.72 | 3.11 | 0.02 |
| FOLR1 | -0.53 | -1.82 | 0.75 | 4.37E-01 | NA | NA | NA | NA | NA | NA | NA | NA |
| GDF15 | -1.62 | -2.92 | -0.32 | 4.31E-02 | -1.00 | -1.75 | -0.25 | 3.14E-02 | -0.61 | -1.79 | 0.56 | 0.35 |
| GSTA3 | 1.60 | 0.40 | 2.80 | 3.76E-02 | 0.08 | -0.34 | 0.50 | 7.73E-01 | 1.52 | 0.39 | 2.65 | 0.03 |
| ICAM1 | -0.62 | -1.92 | 0.67 | 3.80E-01 | NA | NA | NA | NA | NA | NA | NA | NA |
| IGFBP1 | -0.06 | -1.35 | 1.22 | 9.20E-01 | NA | NA | NA | NA | NA | NA | NA | NA |
| IL1RL1 | -1.51 | -2.75 | -0.28 | 3.95E-02 | -0.54 | -1.17 | 0.08 | 1.24E-01 | -0.97 | -2.07 | 0.13 | 0.13 |
| IL2RA | -0.26 | -1.44 | 0.92 | 6.82E-01 | NA | NA | NA | NA | NA | NA | NA | NA |
| IL5RA | -1.39 | -2.62 | -0.17 | 4.84E-02 | -1.05 | -1.69 | -0.40 | 9.53E-03 | -0.35 | -1.43 | 0.74 | 0.54 |
| ITGB6 | -3.76 | -5.00 | -2.52 | 6.30E-08 | -2.21 | -3.16 | -1.26 | 7.03E-05 | -1.55 | -2.71 | -0.39 | 0.03 |
| LCP1 | -1.41 | -2.63 | -0.20 | 4.54E-02 | -0.04 | -0.73 | 0.65 | 9.04E-01 | -1.37 | -2.48 | -0.27 | 0.04 |
| LRG1 | -1.06 | -2.27 | 0.15 | 1.28E-01 | NA | NA | NA | NA | NA | NA | NA | NA |
| LTBP2 | -3.02 | -4.43 | -1.61 | 4.18E-04 | -1.04 | -1.92 | -0.15 | 6.12E-02 | -1.98 | -3.21 | -0.76 | 0.04 |
| MMP10 | -1.58 | -2.88 | -0.28 | 3.87E-02 | -1.17 | -1.93 | -0.40 | 1.16E-02 | -0.41 | -1.55 | 0.73 | 0.50 |
| MMP7 | -1.14 | -2.52 | 0.24 | 1.45E-01 | NA | NA | NA | NA | NA | NA | NA | NA |
| MRC1 | -1.56 | -2.83 | -0.29 | 4.17E-02 | -0.65 | -1.33 | 0.02 | 9.36E-02 | -0.91 | -2.02 | 0.21 | 0.16 |
| MSTN | 0.95 | -0.29 | 2.18 | 1.74E-01 | NA | NA | NA | NA | NA | NA | NA | NA |
| MZB1 | -1.21 | -2.47 | 0.05 | 9.11E-02 | NA | NA | NA | NA | NA | NA | NA | NA |
| NOS3 | -1.05 | -2.29 | 0.18 | 1.35E-01 | NA | NA | NA | NA | NA | NA | NA | NA |
| NTRK2 | 1.18 | 0.05 | 2.31 | 6.32E-02 | NA | NA | NA | NA | NA | NA | NA | NA |
| PLA2G10 | -1.94 | -3.19 | -0.69 | 1.20E-02 | -1.52 | -2.27 | -0.77 | 6.25E-04 | -0.42 | -1.50 | 0.65 | 0.48 |
| PLAUR | -1.75 | -3.06 | -0.43 | 3.55E-02 | -0.84 | -1.63 | -0.06 | 7.08E-02 | -0.90 | -2.04 | 0.23 | 0.16 |
| PPL | -1.49 | -2.75 | -0.23 | 4.16E-02 | -0.70 | -1.39 | 0.00 | 8.93E-02 | -0.79 | -1.94 | 0.36 | 0.23 |
| RTN4R | 1.59 | 0.40 | 2.78 | 3.27E-02 | 0.04 | -0.43 | 0.51 | 9.01E-01 | 1.55 | 0.47 | 2.63 | 0.02 |
| SCGB3A2 | -0.92 | -2.28 | 0.45 | 2.25E-01 | NA | NA | NA | NA | NA | NA | NA | NA |
| SDC1 | -1.35 | -2.57 | -0.13 | 5.22E-02 | NA | NA | NA | NA | NA | NA | NA | NA |
| SERPINA3 | -0.70 | -1.89 | 0.49 | 2.82E-01 | NA | NA | NA | NA | NA | NA | NA | NA |
| SFTPA2 | -1.44 | -2.80 | -0.09 | 6.08E-02 | NA | NA | NA | NA | NA | NA | NA | NA |
| SFTPD | -0.66 | -1.84 | 0.52 | 3.04E-01 | NA | NA | NA | NA | NA | NA | NA | NA |
| SPINT1 | -1.69 | -2.99 | -0.39 | 3.62E-02 | -1.01 | -1.84 | -0.18 | 5.41E-02 | -0.68 | -1.81 | 0.45 | 0.30 |
| THBS2 | -2.38 | -3.62 | -1.14 | 2.00E-03 | -0.63 | -1.34 | 0.08 | 1.23E-01 | -1.75 | -2.88 | -0.63 | 0.01 |
| TNC | -1.54 | -2.77 | -0.30 | 4.06E-02 | -0.48 | -1.11 | 0.16 | 1.86E-01 | -1.06 | -2.17 | 0.04 | 0.11 |
| TNFRSF10B | -2.13 | -3.46 | -0.81 | 9.59E-03 | -0.97 | -1.81 | -0.14 | 5.65E-02 | -1.16 | -2.41 | 0.09 | 0.11 |
| WFDC2 | -0.92 | -2.42 | 0.58 | 2.70E-01 | NA | NA | NA | NA | NA | NA | NA | NA |
| Abbreviations: CI = confidence interval; FDR = false discovery rate. Protein abbreviations are shown in Table E2. | | | | | | | | | | | | |
| Total effect coefficient represents the difference in restricted mean survival time (months) for those in the tenth decile of protein relative abundance compared to the first decile. Natural indirect effect coefficient represents the difference in survival between these groups due to declining lung function, while natural direct effect coefficient represents the difference in survival between these groups due to an alternate pathway. | | | | | | | | | | | | |
| Natural direct and indirect effects not calculated when total effect FDR p>0.05. | | | | | | | | | | | | |

| **Table E5. Pooled cohort (n=3135) mediation analysis results stratified by age** | | | | | | | | | |
| --- | --- | --- | --- | --- | --- | --- | --- | --- | --- |
| Protein | Age < 65 (n=1145) | | | | | | | | |
| **Natural Indirect Effect** | | | **Natural Direct Effect** | | | **Total Effect** | | |
| **Coeff** | **95% CI Low** | **95% CI High** | **Coeff** | **95% CI Low** | **95% CI High** | **Coeff** | **95% CI Low** | **95% CI High** |
| AREG | -2.25 | -3.12 | -1.37 | -2.02 | -3.08 | -0.95 | -4.26 | -5.53 | -2.99 |
| CSF2 | -1.15 | -1.87 | -0.44 | -1.84 | -2.91 | -0.78 | -3.00 | -4.26 | -1.74 |
| GDF15 | -1.57 | -2.44 | -0.70 | -1.79 | -2.93 | -0.64 | -3.36 | -4.70 | -2.02 |
| IL5RA | -0.83 | -1.56 | -0.10 | -0.51 | -1.66 | 0.63 | -1.34 | -2.68 | 0.00 |
| ITGB6 | -2.06 | -3.03 | -1.09 | -0.98 | -2.20 | 0.24 | -3.04 | -4.43 | -1.64 |
| MMP10 | -1.04 | -1.76 | -0.32 | -0.73 | -1.88 | 0.42 | -1.76 | -3.13 | -0.40 |
| PLA2G10 | -1.39 | -2.25 | -0.54 | -0.74 | -1.89 | 0.42 | -2.13 | -3.47 | -0.78 |
| Protein | Age ≥ 65 (n=1990) | | | | | | | | |
| **Natural Indirect Effect** | | | **Natural Direct Effect** | | | **Total Effect** | | |
| **Coeff** | **95% CI Low** | **95% CI High** | **Coeff** | **95% CI Low** | **95% CI High** | **Coeff** | **95% CI Low** | **95% CI High** |
| AREG | -2.71 | -3.53 | -1.88 | -2.07 | -3.16 | -0.97 | -4.77 | -5.95 | -3.60 |
| CSF2 | -1.04 | -1.63 | -0.45 | -1.29 | -2.23 | -0.35 | -2.33 | -3.38 | -1.27 |
| GDF15 | -1.21 | -1.87 | -0.55 | -1.18 | -2.21 | -0.16 | -2.39 | -3.56 | -1.23 |
| IL5RA | -1.22 | -1.83 | -0.61 | -0.73 | -1.72 | 0.25 | -1.96 | -3.05 | -0.86 |
| ITGB6 | -2.61 | -3.41 | -1.81 | -2.22 | -3.26 | -1.18 | -4.83 | -5.96 | -3.70 |
| MMP10 | -1.27 | -1.94 | -0.60 | -0.62 | -1.66 | 0.42 | -1.89 | -3.06 | -0.71 |
| PLA2G10 | -1.27 | -1.88 | -0.66 | -0.92 | -1.85 | 0.01 | -2.19 | -3.26 | -1.12 |

| **Table E6. Pooled cohort (n=3135) mediation analysis results stratified by sex** | | | | | | | | | |
| --- | --- | --- | --- | --- | --- | --- | --- | --- | --- |
| Protein | Male sex (n=1720) | | | | | | | | |
| **Natural Indirect Effect** | | | **Natural Direct Effect** | | | **Total Effect** | | |
| **Coeff** | **95% CI Low** | **95% CI High** | **Coeff** | **95% CI Low** | **95% CI High** | **Coeff** | **95% CI Low** | **95% CI High** |
| AREG | -2.93 | -3.83 | -2.04 | -2.84 | -4.07 | -1.62 | -5.78 | -7.11 | -4.44 |
| CSF2 | -1.32 | -1.99 | -0.64 | -1.67 | -2.73 | -0.61 | -2.99 | -4.19 | -1.78 |
| GDF15 | -1.54 | -2.31 | -0.78 | -2.02 | -3.19 | -0.84 | -3.56 | -4.90 | -2.21 |
| IL5RA | -1.23 | -1.92 | -0.55 | -0.92 | -2.04 | 0.21 | -2.15 | -3.40 | -0.89 |
| ITGB6 | -2.64 | -3.51 | -1.76 | -2.92 | -4.13 | -1.71 | -5.56 | -6.88 | -4.23 |
| MMP10 | -1.57 | -2.31 | -0.84 | -0.77 | -1.96 | 0.43 | -2.34 | -3.69 | -0.99 |
| PLA2G10 | -1.67 | -2.46 | -0.88 | -0.71 | -1.82 | 0.40 | -2.38 | -3.68 | -1.08 |
| Protein | Female sex (n=1415) | | | | | | | | |
| **Natural Indirect Effect** | | | **Natural Direct Effect** | | | **Total Effect** | | |
| **Coeff** | **95% CI Low** | **95% CI High** | **Coeff** | **95% CI Low** | **95% CI High** | **Coeff** | **95% CI Low** | **95% CI High** |
| AREG | -1.98 | -2.76 | -1.19 | -1.42 | -2.31 | -0.52 | -3.39 | -4.44 | -2.35 |
| CSF2 | -0.82 | -1.41 | -0.23 | -1.23 | -2.12 | -0.35 | -2.06 | -3.06 | -1.05 |
| GDF15 | -1.07 | -1.74 | -0.40 | -0.84 | -1.76 | 0.07 | -1.91 | -2.99 | -0.84 |
| IL5RA | -0.75 | -1.32 | -0.18 | -0.38 | -1.30 | 0.53 | -1.13 | -2.21 | -0.06 |
| ITGB6 | -1.94 | -2.76 | -1.11 | -0.86 | -1.81 | 0.09 | -2.80 | -3.91 | -1.69 |
| MMP10 | -0.65 | -1.25 | -0.05 | -0.72 | -1.69 | 0.25 | -1.37 | -2.50 | -0.24 |
| PLA2G10 | -0.94 | -1.52 | -0.37 | -0.99 | -1.85 | -0.12 | -1.93 | -2.92 | -0.94 |

| **Table E7. Pooled cohort (n=3135) mediation analysis results stratified by race** | | | | | | | | | |
| --- | --- | --- | --- | --- | --- | --- | --- | --- | --- |
| Protein | Non-white race (n=496) | | | | | | | | |
| **Natural Indirect Effect** | | | **Natural Direct Effect** | | | **Total Effect** | | |
| **Coeff** | **95% CI Low** | **95% CI High** | **Coeff** | **95% CI Low** | **95% CI High** | **Coeff** | **95% CI Low** | **95% CI High** |
| AREG | -2.13 | -3.48 | -0.79 | -0.91 | -2.79 | 0.97 | -3.04 | -5.07 | -1.01 |
| CSF2 | -0.89 | -1.76 | -0.03 | -0.20 | -1.88 | 1.48 | -1.09 | -2.99 | 0.80 |
| GDF15 | -1.31 | -2.27 | -0.35 | -0.28 | -2.15 | 1.59 | -1.59 | -3.49 | 0.32 |
| IL5RA | -1.10 | -2.03 | -0.17 | -0.17 | -1.82 | 1.49 | -1.26 | -3.07 | 0.54 |
| ITGB6 | -1.85 | -3.09 | -0.61 | -0.76 | -2.56 | 1.05 | -2.60 | -4.62 | -0.58 |
| MMP10 | -0.77 | -1.61 | 0.08 | 0.14 | -1.67 | 1.94 | -0.63 | -2.73 | 1.47 |
| PLA2G10 | -1.26 | -2.37 | -0.15 | -1.80 | -3.48 | -0.12 | -3.06 | -4.89 | -1.23 |
| Protein | White race (n=2639) | | | | | | | | |
| **Natural Indirect Effect** | | | **Natural Direct Effect** | | | **Total Effect** | | |
| **Coeff** | **95% CI Low** | **95% CI High** | **Coeff** | **95% CI Low** | **95% CI High** | **Coeff** | **95% CI Low** | **95% CI High** |
| AREG | -2.59 | -3.26 | -1.91 | -2.26 | -3.12 | -1.41 | -4.85 | -5.80 | -3.89 |
| CSF2 | -1.14 | -1.67 | -0.61 | -1.74 | -2.52 | -0.96 | -2.87 | -3.77 | -1.98 |
| GDF15 | -1.34 | -1.95 | -0.73 | -1.70 | -2.54 | -0.85 | -3.03 | -4.02 | -2.05 |
| IL5RA | -1.07 | -1.62 | -0.52 | -0.63 | -1.47 | 0.20 | -1.70 | -2.65 | -0.75 |
| ITGB6 | -2.50 | -3.20 | -1.79 | -1.98 | -2.86 | -1.10 | -4.48 | -5.45 | -3.50 |
| MMP10 | -1.26 | -1.83 | -0.68 | -0.89 | -1.75 | -0.03 | -2.15 | -3.14 | -1.16 |
| PLA2G10 | -1.36 | -1.92 | -0.79 | -0.62 | -1.42 | 0.18 | -1.98 | -2.91 | -1.04 |

| **Table E8. Pooled cohort (n=3135) mediation analysis results stratified by baseline FVC** | | | | | | | | | |
| --- | --- | --- | --- | --- | --- | --- | --- | --- | --- |
| Protein | FVC < 70% predicted (n=1437) | | | | | | | | |
| **Natural Indirect Effect** | | | **Natural Direct Effect** | | | **Total Effect** | | |
| **Coeff** | **95% CI Low** | **95% CI High** | **Coeff** | **95% CI Low** | **95% CI High** | **Coeff** | **95% CI Low** | **95% CI High** |
| AREG | -3.00 | -3.93 | -2.07 | -3.01 | -4.33 | -1.69 | -6.01 | -7.43 | -4.60 |
| CSF2 | -1.38 | -2.11 | -0.64 | -2.17 | -3.40 | -0.95 | -3.55 | -4.94 | -2.17 |
| GDF15 | -1.51 | -2.35 | -0.68 | -2.83 | -4.15 | -1.50 | -4.34 | -5.85 | -2.83 |
| IL5RA | -1.46 | -2.27 | -0.66 | -0.77 | -2.04 | 0.49 | -2.24 | -3.69 | -0.79 |
| ITGB6 | -3.13 | -4.10 | -2.16 | -2.62 | -3.97 | -1.26 | -5.75 | -7.20 | -4.29 |
| MMP10 | -1.70 | -2.49 | -0.90 | -0.97 | -2.28 | 0.35 | -2.66 | -4.18 | -1.15 |
| PLA2G10 | -1.33 | -2.19 | -0.47 | -1.49 | -2.78 | -0.20 | -2.82 | -4.27 | -1.37 |
| Protein | FVC ≥ 70% predicted (n=1698) | | | | | | | | |
| **Natural Indirect Effect** | | | **Natural Direct Effect** | | | **Total Effect** | | |
| **Coeff** | **95% CI Low** | **95% CI High** | **Coeff** | **95% CI Low** | **95% CI High** | **Coeff** | **95% CI Low** | **95% CI High** |
| AREG | -1.88 | -2.63 | -1.14 | -1.35 | -2.19 | -0.50 | -3.23 | -4.24 | -2.22 |
| CSF2 | -0.92 | -1.48 | -0.36 | -1.09 | -1.89 | -0.29 | -2.00 | -2.91 | -1.09 |
| GDF15 | -1.04 | -1.65 | -0.43 | -0.36 | -1.21 | 0.49 | -1.40 | -2.36 | -0.44 |
| IL5RA | -0.64 | -1.13 | -0.15 | -0.36 | -1.19 | 0.48 | -1.00 | -1.93 | -0.06 |
| ITGB6 | -1.61 | -2.34 | -0.89 | -1.09 | -1.94 | -0.24 | -2.70 | -3.70 | -1.70 |
| MMP10 | -0.66 | -1.23 | -0.10 | -0.68 | -1.54 | 0.19 | -1.34 | -2.33 | -0.35 |
| PLA2G10 | -1.17 | -1.74 | -0.60 | -0.57 | -1.34 | 0.20 | -1.74 | -2.67 | -0.81 |

| **Table E9. Pooled cohort (n=3135) mediation analysis results stratified by baseline DLCO** | | | | | | | | | |
| --- | --- | --- | --- | --- | --- | --- | --- | --- | --- |
| Protein | DLCO < 50% predicted (n=1709) | | | | | | | | |
| **Natural Indirect Effect** | | | **Natural Direct Effect** | | | **Total Effect** | | |
| **Coeff** | **95% CI Low** | **95% CI High** | **Coeff** | **95% CI Low** | **95% CI High** | **Coeff** | **95% CI Low** | **95% CI High** |
| AREG | -2.84 | -3.70 | -1.97 | -2.83 | -4.06 | -1.60 | -5.67 | -6.99 | -4.34 |
| CSF2 | -1.73 | -2.50 | -0.95 | -2.44 | -3.59 | -1.30 | -4.17 | -5.46 | -2.88 |
| GDF15 | -1.57 | -2.32 | -0.82 | -1.98 | -3.18 | -0.78 | -3.55 | -4.92 | -2.18 |
| IL5RA | -1.44 | -2.18 | -0.71 | -0.62 | -1.80 | 0.55 | -2.07 | -3.40 | -0.73 |
| ITGB6 | -2.69 | -3.59 | -1.79 | -2.98 | -4.24 | -1.71 | -5.66 | -7.02 | -4.30 |
| MMP10 | -1.31 | -2.04 | -0.58 | -1.01 | -2.20 | 0.18 | -2.32 | -3.69 | -0.95 |
| PLA2G10 | -1.38 | -2.18 | -0.58 | -1.59 | -2.77 | -0.40 | -2.97 | -4.32 | -1.61 |
| Protein | DLCO ≥ 50% predicted (n=1426) | | | | | | | | |
| **Natural Indirect Effect** | | | **Natural Direct Effect** | | | **Total Effect** | | |
| **Coeff** | **95% CI Low** | **95% CI High** | **Coeff** | **95% CI Low** | **95% CI High** | **Coeff** | **95% CI Low** | **95% CI High** |
| AREG | -1.73 | -2.48 | -0.98 | -1.30 | -2.07 | -0.53 | -3.03 | -4.05 | -2.02 |
| CSF2 | -0.33 | -0.65 | 0.00 | -0.17 | -0.85 | 0.51 | -0.50 | -1.28 | 0.28 |
| GDF15 | -0.85 | -1.44 | -0.27 | -0.97 | -1.76 | -0.17 | -1.82 | -2.73 | -0.91 |
| IL5RA | -0.41 | -0.85 | 0.02 | -0.42 | -1.15 | 0.30 | -0.84 | -1.68 | 0.01 |
| ITGB6 | -1.65 | -2.42 | -0.89 | -0.59 | -1.33 | 0.15 | -2.24 | -3.23 | -1.25 |
| MMP10 | -0.75 | -1.29 | -0.22 | -0.45 | -1.26 | 0.36 | -1.20 | -2.19 | -0.22 |
| PLA2G10 | -0.92 | -1.43 | -0.40 | -0.19 | -0.85 | 0.47 | -1.10 | -1.92 | -0.28 |

| **Table E10. Pooled cohort (n=3135) mediation analysis results stratified by ILD subtype** | | | | | | | | | |
| --- | --- | --- | --- | --- | --- | --- | --- | --- | --- |
| Protein | Idiopathic Pulmonary Fibrosis (n=1338) | | | | | | | | |
| **Natural Indirect Effect** | | | **Natural Direct Effect** | | | **Total Effect** | | |
| **Coeff** | **95% CI Low** | **95% CI High** | **Coeff** | **95% CI Low** | **95% CI High** | **Coeff** | **95% CI Low** | **95% CI High** |
| AREG | -3.12 | -4.22 | -2.02 | -2.08 | -3.52 | -0.63 | -5.20 | -6.72 | -3.68 |
| CSF2 | -1.73 | -2.55 | -0.90 | -1.71 | -2.93 | -0.49 | -3.44 | -4.80 | -2.08 |
| GDF15 | -1.37 | -2.29 | -0.44 | -1.51 | -2.86 | -0.16 | -2.88 | -4.43 | -1.32 |
| IL5RA | -1.43 | -2.19 | -0.67 | -0.63 | -1.91 | 0.66 | -2.06 | -3.47 | -0.65 |
| ITGB6 | -2.49 | -3.54 | -1.44 | -3.30 | -4.72 | -1.88 | -5.79 | -7.28 | -4.30 |
| MMP10 | -1.00 | -1.82 | -0.18 | -0.50 | -1.84 | 0.83 | -1.50 | -2.99 | 0.00 |
| PLA2G10 | -1.72 | -2.60 | -0.84 | -0.90 | -2.16 | 0.37 | -2.62 | -4.02 | -1.22 |
| Protein | Connective Tissue Disease-associated ILD (n=899) | | | | | | | | |
| **Natural Indirect Effect** | | | **Natural Direct Effect** | | | **Total Effect** | | |
| **Coeff** | **95% CI Low** | **95% CI High** | **Coeff** | **95% CI Low** | **95% CI High** | **Coeff** | **95% CI Low** | **95% CI High** |
| AREG | -1.08 | -1.91 | -0.25 | -1.67 | -2.95 | -0.40 | -2.75 | -4.20 | -1.31 |
| CSF2 | -0.48 | -1.04 | 0.08 | -1.25 | -2.41 | -0.09 | -1.73 | -3.01 | -0.44 |
| GDF15 | -0.78 | -1.47 | -0.08 | -0.98 | -2.22 | 0.26 | -1.76 | -3.07 | -0.45 |
| IL5RA | -0.26 | -1.07 | 0.54 | -0.88 | -2.15 | 0.39 | -1.14 | -2.55 | 0.27 |
| ITGB6 | -1.00 | -1.86 | -0.13 | 0.12 | -1.17 | 1.41 | -0.88 | -2.35 | 0.59 |
| MMP10 | -1.11 | -1.97 | -0.25 | -0.79 | -2.02 | 0.45 | -1.90 | -3.30 | -0.50 |
| PLA2G10 | -0.72 | -1.40 | -0.03 | -0.50 | -1.70 | 0.69 | -1.22 | -2.59 | 0.14 |
| Protein | Other Fibrotic ILDs (n=898) | | | | | | | | |
| **Natural Indirect Effect** | | | **Natural Direct Effect** | | | **Total Effect** | | |
| **Coeff** | **95% CI Low** | **95% CI High** | **Coeff** | **95% CI Low** | **95% CI High** | **Coeff** | **95% CI Low** | **95% CI High** |
| AREG | -3.10 | -4.22 | -1.98 | -2.67 | -3.99 | -1.34 | -5.77 | -7.22 | -4.31 |
| CSF2 | -0.84 | -1.68 | 0.01 | -1.46 | -2.74 | -0.19 | -2.30 | -3.78 | -0.82 |
| GDF15 | -1.95 | -3.00 | -0.90 | -1.74 | -3.15 | -0.33 | -3.69 | -5.38 | -2.00 |
| IL5RA | -1.13 | -1.98 | -0.29 | -0.33 | -1.59 | 0.93 | -1.46 | -2.98 | 0.05 |
| ITGB6 | -3.16 | -4.29 | -2.03 | -2.25 | -3.55 | -0.95 | -5.41 | -6.91 | -3.90 |
| MMP10 | -1.44 | -2.35 | -0.53 | -1.28 | -2.71 | 0.16 | -2.71 | -4.45 | -0.97 |
| PLA2G10 | -1.38 | -2.33 | -0.44 | -1.09 | -2.34 | 0.15 | -2.48 | -4.01 | -0.95 |

| **Table E11. Pooled cohort (n=3135) mediated effects using different protein categorization strategies** | | | | | | | | | | | | |
| --- | --- | --- | --- | --- | --- | --- | --- | --- | --- | --- | --- | --- |
| **Protein** | **Tertile Categorization** | | | **Quartile Categorization** | | | **Quintile Categorization** | | | **Decile Categorization** | | |
| **Coeff** | **95% CI Low** | **95% CI High** | **Coeff** | **95% CI Low** | **95% CI High** | **Coeff** | **95% CI Low** | **95% CI High** | **Coeff** | **95% CI Low** | **95% CI High** |
| AREG | -1.65 | -2.07 | -1.23 | -2.05 | -2.53 | -1.57 | -2.16 | -2.68 | -1.63 | -2.54 | -3.15 | -1.94 |
| CSF2 | -0.75 | -1.09 | -0.42 | -0.90 | -1.27 | -0.52 | -0.98 | -1.38 | -0.58 | -1.13 | -1.59 | -0.66 |
| GDF15 | -0.96 | -1.33 | -0.58 | -1.13 | -1.56 | -0.70 | -1.20 | -1.66 | -0.74 | -1.38 | -1.90 | -0.85 |
| IL5RA | -0.67 | -1.00 | -0.33 | -0.88 | -1.27 | -0.50 | -0.82 | -1.22 | -0.42 | -1.03 | -1.50 | -0.56 |
| ITGB6 | -1.54 | -1.95 | -1.13 | -1.92 | -2.40 | -1.43 | -2.03 | -2.56 | -1.50 | -2.41 | -3.03 | -1.78 |
| MMP10 | -0.80 | -1.15 | -0.45 | -0.99 | -1.39 | -0.59 | -1.13 | -1.57 | -0.69 | -1.22 | -1.71 | -0.72 |
| PLA2G10 | -0.85 | -1.21 | -0.49 | -1.12 | -1.53 | -0.71 | -1.25 | -1.69 | -0.81 | -1.34 | -1.84 | -0.84 |

| **Table E12. Pooled cohort (n=3135) mediated effects before and after excluding those for which DLCO decline was imputed** | | | | | | |
| --- | --- | --- | --- | --- | --- | --- |
| **Protein** | **Including imputed DLCO values (n=3191)** | | | **Excluding imputed DLCO values (n=2952)** | | |
| **Coeff** | **95% CI Low** | **95% CI High** | **Coeff** | **95% CI Low** | **95% CI High** |
| AREG | -2.54 | -3.15 | -1.94 | -2.29 | -2.90 | -1.68 |
| CSF2 | -1.13 | -1.59 | -0.66 | -0.85 | -1.28 | -0.43 |
| GDF15 | -1.38 | -1.90 | -0.85 | -1.25 | -1.78 | -0.72 |
| IL5RA | -1.03 | -1.50 | -0.56 | -0.86 | -1.32 | -0.40 |
| ITGB6 | -2.41 | -3.03 | -1.78 | -2.12 | -2.73 | -1.51 |
| MMP10 | -1.22 | -1.71 | -0.72 | -1.12 | -1.61 | -0.63 |
| PLA2G10 | -1.34 | -1.84 | -0.84 | -1.21 | -1.70 | -0.72 |

# **Supplemental References**

1. Alqalyoobi S, Smith JA, Maddali MV, Pugashetti JV, Newton CA, Kim JS, Linderholm AL, Chen CH, Ma SF, Bose S, Murray S, Adegunsoye A, Strek ME, Garcia CK, Wolters PJ, Martinez FJ, Noth I, Oldham JM. Proteomic Biomarkers of Survival in Non-IPF Interstitial Lung Disease. *Am J Respir Crit Care Med* 2025.

2. Rockey DC, Du Q, Weymouth ND, Shi Z. Smooth Muscle α-Actin Deficiency Leads to Decreased Liver Fibrosis via Impaired Cytoskeletal Signaling in Hepatic Stellate Cells. *Am J Pathol* 2019; 189: 2209-2220.

3. Dulauroy S, Di Carlo SE, Langa F, Eberl G, Peduto L. Lineage tracing and genetic ablation of ADAM12(+) perivascular cells identify a major source of profibrotic cells during acute tissue injury. *Nat Med* 2012; 18: 1262-1270.

4. Oldham JM, Huang Y, Bose S, Ma SF, Kim JS, Schwab A, Ting C, Mou K, Lee CT, Adegunsoye A, Ghodrati S, Vu Pugashetti J, Nazemi N, Strek ME, Linderholm AL, Chen CH, Murray S, Zemans RL, Flaherty KR, Martinez FJ, Noth I. Proteomic Biomarkers of Survival in Idiopathic Pulmonary Fibrosis. *Am J Respir Crit Care Med* 2023.

5. Todd JL, Neely ML, Overton R, Mulder H, Roman J, Lasky JA, de Andrade JA, Gulati M, Huang H, Leonard TB, Hesslinger C, Noth I, Belperio JA, Flaherty KR, Palmer SM, investigators I-PR. Association of Circulating Proteins with Death or Lung Transplant in Patients with Idiopathic Pulmonary Fibrosis in the IPF-PRO Registry Cohort. *Lung* 2022; 200: 11-18.

6. Guo J, Zhou S, Wang H, Qiu X, Dong F, Jiang S, Xu N, Cui Y, Liu R, Li P, Ma Z, Zhao L, Lai EY. ADAMTS13 attenuates renal fibrosis by suppressing thrombospondin 1 mediated TGF-β1/Smad3 activation. *Toxicol Appl Pharmacol* 2025; 496: 117260.

7. Pettinelli P, Arendt BM, Teterina A, McGilvray I, Comelli EM, Fung SK, Fischer SE, Allard JP. Altered hepatic genes related to retinol metabolism and plasma retinol in patients with non-alcoholic fatty liver disease. *PLoS One* 2018; 13: e0205747.

8. Machahua C, Montes-Worboys A, Planas-Cerezales L, Buendia-Flores R, Molina-Molina M, Vicens-Zygmunt V. Serum AGE/RAGEs as potential biomarker in idiopathic pulmonary fibrosis. *Respiratory Research* 2018; 19: 215.

9. Ge X, Arriazu E, Magdaleno F, Antoine DJ, Dela Cruz R, Theise N, Nieto N. High Mobility Group Box-1 Drives Fibrosis Progression Signaling via the Receptor for Advanced Glycation End Products in Mice. *Hepatology* 2018; 68: 2380-2404.

10. Zhu Q, Mangukiya HB, Mashausi DS, Guo H, Negi H, Merugu SB, Wu Z, Li D. Anterior gradient 2 is induced in cutaneous wound and promotes wound healing through its adhesion domain. *Febs j* 2017; 284: 2856-2869.

11. Zhao R, Wang Z, Wang G, Geng J, Wu H, Liu X, Bin E, Sui J, Dai H, Tang N. Sustained amphiregulin expression in intermediate alveolar stem cells drives progressive fibrosis. *Cell Stem Cell* 2024; 31: 1344-1358.e1346.

12. Gu X, Sun R, Chen L, Chu S, Doll MA, Li X, Feng W, Siskind L, McClain CJ, Deng Z. Neutral Ceramidase Mediates Nonalcoholic Steatohepatitis by Regulating Monounsaturated Fatty Acids and Gut IgA(+) B Cells. *Hepatology* 2021; 73: 901-919.

13. Guan R, Yuan L, Li J, Wang J, Li Z, Cai Z, Guo H, Fang Y, Lin R, Liu W, Wang L, Zheng Q, Xu J, Zhou Y, Qian J, Ding M, Luo J, Li Y, Yang K, Sun D, Yao H, He J, Lu W. Bone morphogenetic protein 4 inhibits pulmonary fibrosis by modulating cellular senescence and mitophagy in lung fibroblasts. *Eur Respir J* 2022; 60.

14. Wang QR, Liu SS, Min JL, Yin M, Zhang Y, Zhang Y, Tang XN, Li X, Liu SS. CCL17 drives fibroblast activation in the progression of pulmonary fibrosis by enhancing the TGF-β/Smad signaling. *Biochem Pharmacol* 2023; 210: 115475.

15. Luzina IG, Tsymbalyuk N, Choi J, Hasday JD, Atamas SP. CCL18-stimulated upregulation of collagen production in lung fibroblasts requires Sp1 signaling and basal Smad3 activity. *J Cell Physiol* 2006; 206: 221-228.

16. Wu M, Baron M, Pedroza C, Salazar GA, Ying J, Charles J, Agarwal SK, Hudson M, Pope J, Zhou X, Reveille JD, Fritzler MJ, Mayes MD, Assassi S. CCL2 in the Circulation Predicts Long-Term Progression of Interstitial Lung Disease in Patients With Early Systemic Sclerosis: Data From Two Independent Cohorts. *Arthritis Rheumatol* 2017; 69: 1871-1878.

17. Hasegawa M, Fujimoto M, Matsushita T, Hamaguchi Y, Takehara K, Sato S. Serum chemokine and cytokine levels as indicators of disease activity in patients with systemic sclerosis. *Clin Rheumatol* 2011; 30: 231-237.

18. Baeck C, Wei X, Bartneck M, Fech V, Heymann F, Gassler N, Hittatiya K, Eulberg D, Luedde T, Trautwein C, Tacke F. Pharmacological inhibition of the chemokine C-C motif chemokine ligand 2 (monocyte chemoattractant protein 1) accelerates liver fibrosis regression by suppressing Ly-6C(+) macrophage infiltration in mice. *Hepatology* 2014; 59: 1060-1072.

19. Cameli P, Bergantini L, D'Alessandro M, Vietri L, Cameli M, Sestini P, Bargagli E. Serum CD59: a novel biomarker of idiopathic pulmonary fibrosis? *Panminerva Med* 2021; 63: 201-205.

20. Pechhold K, Patterson NB, Craighead N, Lee KP, June CH, Harlan DM. Inflammatory cytokines IFN-gamma plus TNF-alpha induce regulated expression of CD80 (B7-1) but not CD86 (B7-2) on murine fibroblasts. *J Immunol* 1997; 158: 4921-4929.

21. Ordonez C, Zhai AB, Camacho-Leal P, Demarte L, Fan MM, Stanners CP. GPI-anchored CEA family glycoproteins CEA and CEACAM6 mediate their biological effects through enhanced integrin alpha5beta1-fibronectin interaction. *J Cell Physiol* 2007; 210: 757-765.

22. Alqalyoobi S, Adegunsoye A, Linderholm A, Hrusch C, Cutting C, Ma SF, Sperling A, Noth I, Strek ME, Oldham JM. Circulating Plasma Biomarkers of Progressive Interstitial Lung Disease. *Am J Respir Crit Care Med* 2020; 201: 250-253.

23. Korthagen NM, van Moorsel CH, Barlo NP, Ruven HJ, Kruit A, Heron M, van den Bosch JM, Grutters JC. Serum and BALF YKL-40 levels are predictors of survival in idiopathic pulmonary fibrosis. *Respir Med* 2011; 105: 106-113.

24. Adegunsoye A, Alqalyoobi S, Linderholm A, Bowman WS, Lee CT, Pugashetti JV, Sarma N, Ma SF, Haczku A, Sperling A, Strek ME, Noth I, Oldham JM. Circulating Plasma Biomarkers of Survival in Antifibrotic-Treated Patients With Idiopathic Pulmonary Fibrosis. *Chest* 2020.

25. Long X, He X, Ohshimo S, Griese M, Sarria R, Guzman J, Costabel U, Bonella F. Serum YKL-40 as predictor of outcome in hypersensitivity pneumonitis. *Eur Respir J* 2017; 49.

26. Nishimura N, De Battista D, McGivern DR, Engle RE, Tice A, Fares-Gusmao R, Kabat J, Pomerenke A, Nguyen H, Sato S, Bock KW, Moore IN, Kleiner DE, Zamboni F, Alter HJ, Govindarajan S, Farci P. Chitinase 3-like 1 is a profibrogenic factor overexpressed in the aging liver and in patients with liver cirrhosis. *Proc Natl Acad Sci U S A* 2021; 118.

27. Habiel DM, Camelo A, Espindola M, Burwell T, Hanna R, Miranda E, Carruthers A, Bell M, Coelho AL, Liu H, Pilataxi F, Clarke L, Grant E, Lewis A, Moore B, Knight DA, Hogaboam CM, Murray LA. Divergent roles for Clusterin in Lung Injury and Repair. *Sci Rep* 2017; 7: 15444.

28. Kelly M, Kolb M, Bonniaud P, Gauldie J. Re-evaluation of fibrogenic cytokines in lung fibrosis. *Curr Pharm Des* 2003; 9: 39-49.

29. Cheng Z, Ou L, Liu Y, Liu X, Li F, Sun B, Che Y, Kong D, Yu Y, Steinhoff G. Granulocyte colony-stimulating factor exacerbates cardiac fibrosis after myocardial infarction in a rat model of permanent occlusion. *Cardiovasc Res* 2008; 80: 425-434.

30. Ceraolo MG, Milan M, Fratini N, Viganò R, Bousselmi S, Soluri A, Pesce E, Mauri PL, Ciuffreda G, Landoni E, Brambilla F, Dotti G, Di Silvestre D, Maiullari F, Bearzi C, Rizzi R. CSPG4.CAR-T Cells Modulate Extracellular Matrix Remodeling in DMD Cardiomyopathy. *Int J Mol Sci* 2025; 26.

31. Tsukui T, Sun KH, Wetter JB, Wilson-Kanamori JR, Hazelwood LA, Henderson NC, Adams TS, Schupp JC, Poli SD, Rosas IO, Kaminski N, Matthay MA, Wolters PJ, Sheppard D. Collagen-producing lung cell atlas identifies multiple subsets with distinct localization and relevance to fibrosis. *Nat Commun* 2020; 11: 1920.

32. Stypmann J, Gläser K, Roth W, Tobin DJ, Petermann I, Matthias R, Mönnig G, Haverkamp W, Breithardt G, Schmahl W, Peters C, Reinheckel T. Dilated cardiomyopathy in mice deficient for the lysosomal cysteine peptidase cathepsin L. *Proc Natl Acad Sci U S A* 2002; 99: 6234-6239.

33. Hoffmann-Vold AM, Weigt SS, Palchevskiy V, Volkmann E, Saggar R, Li N, Midtvedt O, Lund MB, Garen T, Fishbein MC, Ardehali A, Ross DJ, Ueland T, Aukrust P, Lynch JP, 3rd, Elashoff RM, Molberg O, Belperio JA. Augmented concentrations of CX3CL1 are associated with interstitial lung disease in systemic sclerosis. *PLoS One* 2018; 13: e0206545.

34. Greiffo FR, Viteri-Alvarez V, Frankenberger M, Dietel D, Ortega-Gomez A, Lee JS, Hilgendorff A, Behr J, Soehnlein O, Eickelberg O, Fernandez IE. CX3CR1-fractalkine axis drives kinetic changes of monocytes in fibrotic interstitial lung diseases. *Eur Respir J* 2020; 55.

35. Oda K, Kotani T, Takeuchi T, Ishida T, Shoda T, Isoda K, Yoshida S, Nishimura Y, Makino S. Chemokine profiles of interstitial pneumonia in patients with dermatomyositis: a case control study. *Sci Rep* 2017; 7: 1635.

36. Jiang D, Liang J, Campanella GS, Guo R, Yu S, Xie T, Liu N, Jung Y, Homer R, Meltzer EB, Li Y, Tager AM, Goetinck PF, Luster AD, Noble PW. Inhibition of pulmonary fibrosis in mice by CXCL10 requires glycosaminoglycan binding and syndecan-4. *J Clin Invest* 2010; 120: 2049-2057.

37. Taniguchi T, Miyagawa T, Toyama S, Yamashita T, Nakamura K, Saigusa R, Ichimura Y, Takahashi T, Toyama T, Yoshizaki A, Sato S, Asano Y. CXCL13 produced by macrophages due to Fli1 deficiency may contribute to the development of tissue fibrosis, vasculopathy and immune activation in systemic sclerosis. *Exp Dermatol* 2018; 27: 1030-1037.

38. Nukui Y, Yamana T, Masuo M, Tateishi T, Kishino M, Tateishi U, Tomita M, Hasegawa T, Aritsu T, Miyazaki Y. Serum CXCL9 and CCL17 as biomarkers of declining pulmonary function in chronic bird-related hypersensitivity pneumonitis. *PLoS One* 2019; 14: e0220462.

39. Shimada S, Makino K, Jinnin M, Sawamura S, Kawano Y, Ide M, Kajihara I, Makino T, Fukushima S, Ihn H. CXCL17-mediated downregulation of type I collagen via MMP1 and miR-29 in skin fibroblasts possibly contributes to the fibrosis in systemic sclerosis. *J Dermatol Sci* 2020; 100: 183-191.

40. Richmond JM, Patel D, Watanabe T, Chen HW, Martyanov V, Werner G, Garg M, Haddadi NS, Refat MA, Mahmoud BH, Wong LD, Dresser K, Deng A, Zhu JL, McAlpine W, Hosler GA, Feghali-Bostwick CA, Whitfield ML, Harris JE, Torok KS, Jacobe HT. CXCL9 Links Skin Inflammation and Fibrosis through CXCR3-Dependent Upregulation of Col1a1 in Fibroblasts. *J Invest Dermatol* 2023; 143: 1138-1146.e1112.

41. Rodriguez P, Sassi Y, Troncone L, Benard L, Ishikawa K, Gordon RE, Lamas S, Laborda J, Hajjar RJ, Lebeche D. Deletion of delta-like 1 homologue accelerates fibroblast-myofibroblast differentiation and induces myocardial fibrosis. *Eur Heart J* 2019; 40: 967-978.

42. Liu X, Meng L, Shi Q, Liu S, Cui C, Hu S, Wei Y. Dermatopontin promotes adhesion, spreading and migration of cardiac fibroblasts in vitro. *Matrix Biol* 2013; 32: 23-31.

43. Brodehl A, Belke DD, Garnett L, Martens K, Abdelfatah N, Rodriguez M, Diao C, Chen YX, Gordon PM, Nygren A, Gerull B. Transgenic mice overexpressing desmocollin-2 (DSC2) develop cardiomyopathy associated with myocardial inflammation and fibrotic remodeling. *PLoS One* 2017; 12: e0174019.

44. Duangrat R, Parichatikanond W, Likitnukul S, Mangmool S. Endothelin-1 Induces Cell Proliferation and Myofibroblast Differentiation through the ET(A)R/G(αq)/ERK Signaling Pathway in Human Cardiac Fibroblasts. *Int J Mol Sci* 2023; 24.

45. Chen W, Yan X, Xu A, Sun Y, Wang B, Huang T, Wang H, Cong M, Wang P, Yang A, Jia J, You H. Dynamics of elastin in liver fibrosis: Accumulates late during progression and degrades slowly in regression. *J Cell Physiol* 2019; 234: 22613-22622.

46. Scheving LA, Zhang X, Threadgill DW, Russell WE. Hepatocyte ERBB3 and EGFR are required for maximal CCl4-induced liver fibrosis. *Am J Physiol Gastrointest Liver Physiol* 2016; 311: G807-g816.

47. Kimura T, Monslow J, Klampatsa A, Leibowitz M, Sun J, Liousia M, Woodruff P, Moon E, Todd L, Puré E, Albelda SM. Loss of cells expressing fibroblast activation protein has variable effects in models of TGF-β and chronic bleomycin-induced fibrosis. *Am J Physiol Lung Cell Mol Physiol* 2019; 317: L271-l282.

48. Tan S, Liu X, Chen L, Wu X, Tao L, Pan X, Tan S, Liu H, Jiang J, Wu B. Fas/FasL mediates NF-κBp65/PUMA-modulated hepatocytes apoptosis via autophagy to drive liver fibrosis. *Cell Death Dis* 2021; 12: 474.

49. Xiang L, Wang X, Shao Y, Jiao Q, Cheng J, Zheng X, Zhou S, Chen Y. Folate Decoration Supports the Targeting of Camptothecin Micelles against Activated Hepatic Stellate Cells and the Suppression of Fibrogenesis. *ACS Appl Mater Interfaces* 2023; 15: 2030-2042.

50. Zhang Y, Jiang M, Nouraie M, Roth MG, Tabib T, Winters S, Chen X, Sembrat J, Chu Y, Cardenes N, Tuder RM, Herzog EL, Ryu C, Rojas M, Lafyatis R, Gibson KF, McDyer JF, Kass DJ, Alder JK. GDF15 is an epithelial-derived biomarker of idiopathic pulmonary fibrosis. *Am J Physiol Lung Cell Mol Physiol* 2019; 317: L510-l521.

51. Radwanska A, Cottage CT, Piras A, Overed-Sayer C, Sihlbom C, Budida R, Wrench C, Connor J, Monkley S, Hazon P, Schluter H, Thomas MJ, Hogaboam CM, Murray LA. Increased expression and accumulation of GDF15 in IPF extracellular matrix contribute to fibrosis. *JCI Insight* 2022; 7.

52. Chen H, Gan Q, Yang C, Peng X, Qin J, Qiu S, Jiang Y, Tu S, He Y, Li S, Yang H, Tao L, Peng Y. A novel role of glutathione S-transferase A3 in inhibiting hepatic stellate cell activation and rat hepatic fibrosis. *J Transl Med* 2019; 17: 280.

53. Clynick B, Corte TJ, Jo HE, Stewart I, Glaspole IN, Grainge C, Maher TM, Navaratnam V, Hubbard R, Hopkins PMA, Reynolds PN, Chapman S, Zappala C, Keir GJ, Cooper WA, Mahar AM, Ellis S, Goh NS, De Jong E, Cha L, Tan DBA, Leigh L, Oldmeadow C, Walters EH, Jenkins RG, Moodley Y. Biomarker signatures for progressive idiopathic pulmonary fibrosis. *Eur Respir J* 2022; 59.

54. Richards TJ, Kaminski N, Baribaud F, Flavin S, Brodmerkel C, Horowitz D, Li K, Choi J, Vuga LJ, Lindell KO, Klesen M, Zhang Y, Gibson KF. Peripheral blood proteins predict mortality in idiopathic pulmonary fibrosis. *Am J Respir Crit Care Med* 2012; 185: 67-76.

55. Hasegawa M, Asano Y, Endo H, Fujimoto M, Goto D, Ihn H, Inoue K, Ishikawa O, Kawaguchi Y, Kuwana M, Ogawa F, Takahashi H, Tanaka S, Sato S, Takehara K. Serum adhesion molecule levels as prognostic markers in patients with early systemic sclerosis: a multicentre, prospective, observational study. *PLoS One* 2014; 9: e88150.

56. Hamaguchi Y, Nishizawa Y, Yasui M, Hasegawa M, Kaburagi Y, Komura K, Nagaoka T, Saito E, Shimada Y, Takehara K, Kadono T, Steeber DA, Tedder TF, Sato S. Intercellular adhesion molecule-1 and L-selectin regulate bleomycin-induced lung fibrosis. *Am J Pathol* 2002; 161: 1607-1618.

57. O'Flaherty BM, Matar CG, Wakeman BS, Garcia A, Wilke CA, Courtney CL, Moore BB, Speck SH. CD8+ T Cell Response to Gammaherpesvirus Infection Mediates Inflammation and Fibrosis in Interferon Gamma Receptor-Deficient Mice. *PLoS One* 2015; 10: e0135719.

58. Scharf JG, Dombrowski F, Novosyadlyy R, Eisenbach C, Demori I, Kübler B, Braulke T. Insulin-like growth factor (IGF)-binding protein-1 is highly induced during acute carbon tetrachloride liver injury and potentiates the IGF-I-stimulated activation of rat hepatic stellate cells. *Endocrinology* 2004; 145: 3463-3472.

59. Brandt K, Grünler J, Brismar K, Wang J. Effects of IGFBP-1 and IGFBP-2 and their fragments on migration and IGF-induced proliferation of human dermal fibroblasts. *Growth Horm IGF Res* 2015; 25: 34-40.

60. Huang YH, Chen MH, Guo QL, Chen ZX, Chen QD, Wang XZ. Interleukin-10 induces senescence of activated hepatic stellate cells via STAT3-p53 pathway to attenuate liver fibrosis. *Cell Signal* 2020; 66: 109445.

61. Zhu X, Lu J, Rao J, Ru D, Gao M, Shi D, Cao K, Wen S, Dai C, Wang X, Mi W, Liu L, Zhou H. Crosstalk between Interleukin-1 Receptor-Like 1 and Transforming Growth Factor-β Receptor Signaling Promotes Renal Fibrosis. *Am J Pathol* 2023; 193: 1029-1045.

62. Oka S, Furukawa H, Shimada K, Hayakawa H, Fukui N, Tsuchiya N, Tohma S. Serum biomarker analysis of collagen disease patients with acute-onset diffuse interstitial lung disease. *BMC Immunol* 2013; 14: 9.

63. Gruss HJ, Scott C, Rollins BJ, Brach MA, Herrmann F. Human fibroblasts express functional IL-2 receptors formed by the IL-2R alpha- and beta-chain subunits: association of IL-2 binding with secretion of the monocyte chemoattractant protein-1. *J Immunol* 1996; 157: 851-857.

64. Chen S, Zhao T, Xie S, Wan X. Epithelial IL5RA promotes epithelial-mesenchymal transition in pulmonary fibrosis via Jak2/STAT3 cascade. *Pulm Pharmacol Ther* 2024; 84: 102286.

65. De Lauretis A, Sestini P, Pantelidis P, Hoyles R, Hansell DM, Goh NS, Zappala CJ, Visca D, Maher TM, Denton CP, Ong VH, Abraham DJ, Kelleher P, Hector L, Wells AU, Renzoni EA. Serum interleukin 6 is predictive of early functional decline and mortality in interstitial lung disease associated with systemic sclerosis. *J Rheumatol* 2013; 40: 435-446.

66. Nara M, Komatsuda A, Omokawa A, Togashi M, Okuyama S, Sawada K, Wakui H. Serum interleukin 6 levels as a useful prognostic predictor of clinically amyopathic dermatomyositis with rapidly progressive interstitial lung disease. *Mod Rheumatol* 2014; 24: 633-636.

67. Le TT, Karmouty-Quintana H, Melicoff E, Le TT, Weng T, Chen NY, Pedroza M, Zhou Y, Davies J, Philip K, Molina J, Luo F, George AT, Garcia-Morales LJ, Bunge RR, Bruckner BA, Loebe M, Seethamraju H, Agarwal SK, Blackburn MR. Blockade of IL-6 Trans signaling attenuates pulmonary fibrosis. *J Immunol* 2014; 193: 3755-3768.

68. Joshi N, Kopec AK, Ray JL, Cline-Fedewa H, Nawabi A, Schmitt T, Nault R, Zacharewski TR, Rockwell CE, Flick MJ, Luyendyk JP. Fibrin deposition following bile duct injury limits fibrosis through an αMβ2-dependent mechanism. *Blood* 2016; 127: 2751-2762.

69. Joshi H, Almgren-Bell A, Anaya EP, Todd EM, Van Dyken SJ, Seth A, McIntire KM, Singamaneni S, Sutterwala F, Morley SC. L-plastin enhances NLRP3 inflammasome assembly and bleomycin-induced lung fibrosis. *Cell Rep* 2022; 38: 110507.

70. Petrescu AD, Grant S, Williams E, An SY, Seth N, Shell M, Amundsen T, Tan C, Nadeem Y, Tjahja M, Weld L, Chu CS, Venter J, Frampton G, McMillin M, DeMorrow S. Leptin Enhances Hepatic Fibrosis and Inflammation in a Mouse Model of Cholestasis. *Am J Pathol* 2022; 192: 484-502.

71. Nguyen HN, Jeong Y, Kim Y, Kamiya M, Kim Y, Athar H, Castaldi PJ, Hersh CP, Menon JA, Wong J, Chan I, Oldham WM, Padera RF, Sharma NS, Sholl LM, Vivero M, Watts GFM, Knipe RS, Black KE, Hariri LP, Yun JH, Merriam LT, Yuan K, Kim EY, Brenner MB. Leukemia inhibitory factor (LIF) receptor amplifies pathogenic activation of fibroblasts in lung fibrosis. *Proc Natl Acad Sci U S A* 2024; 121: e2401899121.

72. Hong Q, Cai H, Zhang L, Li Z, Zhong F, Ni Z, Cai G, Chen XM, He JC, Lee K. Modulation of transforming growth factor-β-induced kidney fibrosis by leucine-rich ⍺-2 glycoprotein-1. *Kidney Int* 2022; 101: 299-314.

73. Zou M, Zou J, Hu X, Zheng W, Zhang M, Cheng Z. Latent Transforming Growth Factor-β Binding Protein-2 Regulates Lung Fibroblast-to-Myofibroblast Differentiation in Pulmonary Fibrosis via NF-κB Signaling. *Front Pharmacol* 2021; 12: 788714.

74. Biasin V, Wygrecka M, Marsh LM, Becker-Pauly C, Brcic L, Ghanim B, Klepetko W, Olschewski A, Kwapiszewska G. Meprin β contributes to collagen deposition in lung fibrosis. *Scientific Reports* 2017; 7: 39969.

75. Herrera I, Cisneros J, Maldonado M, Ramírez R, Ortiz-Quintero B, Anso E, Chandel NS, Selman M, Pardo A. Matrix metalloproteinase (MMP)-1 induces lung alveolar epithelial cell migration and proliferation, protects from apoptosis, and represses mitochondrial oxygen consumption. *J Biol Chem* 2013; 288: 25964-25975.

76. Ishimura T, Ishii A, Yamada H, Osaki K, Toda N, Mori KP, Ohno S, Kato Y, Handa T, Sugioka S, Ikushima A, Nishio H, Yanagita M, Yokoi H. Matrix metalloproteinase-10 deficiency has protective effects against peritoneal inflammation and fibrosis via transcription factor NFκΒ pathway inhibition. *Kidney Int* 2023; 104: 929-942.

77. Lee KS, Ryoo YW, Song JY. Interferon-gamma upregulates the stromelysin-1 gene expression by human skin fibroblasts in culture. *Exp Mol Med* 1998; 30: 59-64.

78. Maher TM, Oballa E, Simpson JK, Porte J, Habgood A, Fahy WA, Flynn A, Molyneaux PL, Braybrooke R, Divyateja H, Parfrey H, Rassl D, Russell AM, Saini G, Renzoni EA, Duggan AM, Hubbard R, Wells AU, Lukey PT, Marshall RP, Jenkins RG. An epithelial biomarker signature for idiopathic pulmonary fibrosis: an analysis from the multicentre PROFILE cohort study. *Lancet Respir Med* 2017; 5: 946-955.

79. Song JW, Do KH, Jang SJ, Colby TV, Han S, Kim DS. Blood biomarkers MMP-7 and SP-A: predictors of outcome in idiopathic pulmonary fibrosis. *Chest* 2013; 143: 1422-1429.

80. Zuo F, Kaminski N, Eugui E, Allard J, Yakhini Z, Ben-Dor A, Lollini L, Morris D, Kim Y, DeLustro B, Sheppard D, Pardo A, Selman M, Heller RA. Gene expression analysis reveals matrilysin as a key regulator of pulmonary fibrosis in mice and humans. *Proc Natl Acad Sci U S A* 2002; 99: 6292-6297.

81. Espindola MS, Habiel DM, Coelho AL, Stripp B, Parks WC, Oldham J, Martinez FJ, Noth I, Lopez D, Mikels-Vigdal A, Smith V, Hogaboam CM. Differential Responses to Targeting Matrix Metalloproteinase 9 in Idiopathic Pulmonary Fibrosis. *Am J Respir Crit Care Med* 2021; 203: 458-470.

82. Soldano S, Pizzorni C, Paolino S, Trombetta AC, Montagna P, Brizzolara R, Ruaro B, Sulli A, Cutolo M. Alternatively Activated (M2) Macrophage Phenotype Is Inducible by Endothelin-1 in Cultured Human Macrophages. *PLoS One* 2016; 11: e0166433.

83. Koyama Y, Wang P, Liang S, Iwaisako K, Liu X, Xu J, Zhang M, Sun M, Cong M, Karin D, Taura K, Benner C, Heinz S, Bera T, Brenner DA, Kisseleva T. Mesothelin/mucin 16 signaling in activated portal fibroblasts regulates cholestatic liver fibrosis. *J Clin Invest* 2017; 127: 1254-1270.

84. Quan BH, Liu XY, Li ZY, Han SZ, Cui QC, Chang SY, Lv ST, Yin XJ, Liang S. MSTN gene knockout suppresses the activation of lung fibroblasts through the inhibition of the Smad/AKT signaling pathway, thereby ameliorating pulmonary fibrosis. *Cell Signal* 2025; 129: 111673.

85. Ballester B, Milara J, Montero P, Cortijo J. MUC16 Is Overexpressed in Idiopathic Pulmonary Fibrosis and Induces Fibrotic Responses Mediated by Transforming Growth Factor-β1 Canonical Pathway. *Int J Mol Sci* 2021; 22.

86. Schiller HB, Mayr CH, Leuschner G, Strunz M, Staab-Weijnitz C, Preisendörfer S, Eckes B, Moinzadeh P, Krieg T, Schwartz DA, Hatz RA, Behr J, Mann M, Eickelberg O. Deep Proteome Profiling Reveals Common Prevalence of MZB1-Positive Plasma B Cells in Human Lung and Skin Fibrosis. *Am J Respir Crit Care Med* 2017; 196: 1298-1310.

87. Kazakov A, Hall R, Jagoda P, Bachelier K, Müller-Best P, Semenov A, Lammert F, Böhm M, Laufs U. Inhibition of endothelial nitric oxide synthase induces and enhances myocardial fibrosis. *Cardiovasc Res* 2013; 100: 211-221.

88. Kapoun AM, Liang F, O'Young G, Damm DL, Quon D, White RT, Munson K, Lam A, Schreiner GF, Protter AA. B-type natriuretic peptide exerts broad functional opposition to transforming growth factor-beta in primary human cardiac fibroblasts: fibrosis, myofibroblast conversion, proliferation, and inflammation. *Circ Res* 2004; 94: 453-461.

89. Nangle LA, Xu Z, Siefker D, Burkart C, Chong YE, Zhai L, Geng Y, Polizzi C, Guy L, Eide L, Tong Y, Klopp-Savino S, Ferrer M, Rauch K, Wang A, Hamel K, Crampton S, Paz S, Chiang KP, Do MH, Burman L, Lee D, Zhang M, Ogilvie K, King D, Adams RA, Schimmel P. A human histidyl-tRNA synthetase splice variant therapeutic targets NRP2 to resolve lung inflammation and fibrosis. *Sci Transl Med* 2025; 17: eadp4754.

90. Cherubini E, Mariotta S, Scozzi D, Mancini R, Osman G, D'Ascanio M, Bruno P, Cardillo G, Ricci A. BDNF/TrkB axis activation promotes epithelial-mesenchymal transition in idiopathic pulmonary fibrosis. *J Transl Med* 2017; 15: 196.

91. Nagahama KY, Togo S, Holz O, Magnussen H, Liu X, Seyama K, Takahashi K, Rennard SI. Oncostatin M modulates fibroblast function via signal transducers and activators of transcription proteins-3. *Am J Respir Cell Mol Biol* 2013; 49: 582-591.

92. Jaiswal A, Rehman R, Dutta J, Singh S, Ray A, Shridhar M, Jaisankar J, Bhatt M, Khandelwal D, Sahoo B, Ram A, Mabalirajan U. Cellular Distribution of Secreted Phospholipase A2 in Lungs of IPF Patients and Its Inhibition in Bleomycin-Induced Pulmonary Fibrosis in Mice. *Cells* 2023; 12.

93. Zhang LP, Takahara T, Yata Y, Furui K, Jin B, Kawada N, Watanabe A. Increased expression of plasminogen activator and plasminogen activator inhibitor during liver fibrogenesis of rats: role of stellate cells. *J Hepatol* 1999; 31: 703-711.

94. Naik PK, Bozyk PD, Bentley JK, Popova AP, Birch CM, Wilke CA, Fry CD, White ES, Sisson TH, Tayob N, Carnemolla B, Orecchia P, Flaherty KR, Hershenson MB, Murray S, Martinez FJ, Moore BB. Periostin promotes fibrosis and predicts progression in patients with idiopathic pulmonary fibrosis. *Am J Physiol Lung Cell Mol Physiol* 2012; 303: L1046-1056.

95. Tajiri M, Okamoto M, Fujimoto K, Johkoh T, Ono J, Tominaga M, Azuma K, Kawayama T, Ohta S, Izuhara K, Hoshino T. Serum level of periostin can predict long-term outcome of idiopathic pulmonary fibrosis. *Respir Investig* 2015; 53: 73-81.

96. Nukui Y, Miyazaki Y, Masuo M, Okamoto T, Furusawa H, Tateishi T, Kishino M, Tateishi U, Ono J, Ohta S, Izuhara K, Inase N. Periostin as a predictor of prognosis in chronic bird-related hypersensitivity pneumonitis. *Allergol Int* 2019; 68: 363-369.

97. Yang L, Serada S, Fujimoto M, Terao M, Kotobuki Y, Kitaba S, Matsui S, Kudo A, Naka T, Murota H, Katayama I. Periostin facilitates skin sclerosis via PI3K/Akt dependent mechanism in a mouse model of scleroderma. *PLoS One* 2012; 7: e41994.

98. Besnard V, Dagher R, Madjer T, Joannes A, Jaillet M, Kolb M, Bonniaud P, Murray LA, Sleeman MA, Crestani B. Identification of periplakin as a major regulator of lung injury and repair in mice. *JCI Insight* 2018; 3.

99. Shin WS, Lee HW, Lee ST. Catalytically inactive receptor tyrosine kinase PTK7 activates FGFR1 independent of FGF. *Faseb j* 2019; 33: 12960-12971.

100. Xinguang Y, Huixing Y, Xiaowei W, Xiaojun W, Linghua Y. R-spondin1 arguments hepatic fibrogenesis in vivo and in vitro. *J Surg Res* 2015; 193: 598-605.

101. Zhang M, Haughey M, Wang NY, Blease K, Kapoun AM, Couto S, Belka I, Hoey T, Groza M, Hartke J, Bennett B, Cain J, Gurney A, Benish B, Castiglioni P, Drew C, Lachowicz J, Carayannopoulos L, Nathan SD, Distler J, Brenner DA, Hariharan K, Cho H, Xie W. Targeting the Wnt signaling pathway through R-spondin 3 identifies an anti-fibrosis treatment strategy for multiple organs. *PLoS One* 2020; 15: e0229445.

102. Zhang D, Utsumi T, Huang HC, Gao L, Sangwung P, Chung C, Shibao K, Okamoto K, Yamaguchi K, Groszmann RJ, Jozsef L, Hao Z, Sessa WC, Iwakiri Y. Reticulon 4B (Nogo-B) is a novel regulator of hepatic fibrosis. *Hepatology* 2011; 53: 1306-1315.

103. Zhao J, Zhong A, Friedrich EE, Jia S, Xie P, Galiano RD, Mustoe TA, Hong SJ. S100A12 Induced in the Epidermis by Reduced Hydration Activates Dermal Fibroblasts and Causes Dermal Fibrosis. *J Invest Dermatol* 2017; 137: 650-659.

104. Akiyama N, Hozumi H, Isayama T, Okada J, Sugiura K, Yasui H, Suzuki Y, Kono M, Karayama M, Furuhashi K, Enomoto N, Fujisawa T, Inui N, Nakamura Y, Suda T. Clinical significance of serum S100 calcium-binding protein A4 in idiopathic pulmonary fibrosis. *Respirology* 2020; 25: 743-749.

105. Chen L, Li J, Zhang J, Dai C, Liu X, Wang J, Gao Z, Guo H, Wang R, Lu S, Wang F, Zhang H, Chen H, Fan X, Wang S, Qin Z. S100A4 promotes liver fibrosis via activation of hepatic stellate cells. *J Hepatol* 2015; 62: 156-164.

106. Kurotani R, Okumura S, Matsubara T, Yokoyama U, Buckley JR, Tomita T, Kezuka K, Nagano T, Esposito D, Taylor TE, Gillette WK, Ishikawa Y, Abe H, Ward JM, Kimura S. Secretoglobin 3A2 suppresses bleomycin-induced pulmonary fibrosis by transforming growth factor beta signaling down-regulation. *J Biol Chem* 2011; 286: 19682-19692.

107. Cai Y, Kimura S. Secretoglobin 3A2 Exhibits Anti-Fibrotic Activity in Bleomycin-Induced Pulmonary Fibrosis Model Mice. *PLoS One* 2015; 10: e0142497.

108. Parimon T, Yao C, Habiel DM, Ge L, Bora SA, Brauer R, Evans CM, Xie T, Alonso-Valenteen F, Medina-Kauwe LK, Jiang D, Noble PW, Hogaboam CM, Deng N, Burgy O, Antes TJ, Königshoff M, Stripp BR, Gharib SA, Chen P. Syndecan-1 promotes lung fibrosis by regulating epithelial reprogramming through extracellular vesicles. *JCI Insight* 2019; 5.

109. Maitra M, Wang Y, Gerard RD, Mendelson CR, Garcia CK. Surfactant protein A2 mutations associated with pulmonary fibrosis lead to protein instability and endoplasmic reticulum stress. *J Biol Chem* 2010; 285: 22103-22113.

110. Kennedy B, Branagan P, Moloney F, Haroon M, O'Connell OJ, O'Connor TM, O'Regan K, Harney S, Henry MT. Biomarkers to identify ILD and predict lung function decline in scleroderma lung disease or idiopathic pulmonary fibrosis. *Sarcoidosis Vasc Diffuse Lung Dis* 2015; 32: 228-236.

111. Aono Y, Ledford JG, Mukherjee S, Ogawa H, Nishioka Y, Sone S, Beers MF, Noble PW, Wright JR. Surfactant protein-D regulates effector cell function and fibrotic lung remodeling in response to bleomycin injury. *Am J Respir Crit Care Med* 2012; 185: 525-536.

112. Maekawa T, Kato S, Kawamura T, Takada K, Sone T, Ogata H, Saito K, Izumi T, Nagao S, Takano K, Okada Y, Tachi N, Teramoto M, Horiuchi T, Hikota-Saga R, Endo-Umeda K, Uno S, Osawa Y, Kobayashi A, Kobayashi S, Sato K, Hashimoto M, Suzu S, Usuki K, Morishita S, Araki M, Makishima M, Komatsu N, Kimura F. Increased SLAMF7(high) monocytes in myelofibrosis patients harboring JAK2V617F provide a therapeutic target of elotuzumab. *Blood* 2019; 134: 814-825.

113. Marchand-Adam S, Fabre A, Mailleux AA, Marchal J, Quesnel C, Kataoka H, Aubier M, Dehoux M, Soler P, Crestani B. Defect of pro-hepatocyte growth factor activation by fibroblasts in idiopathic pulmonary fibrosis. *Am J Respir Crit Care Med* 2006; 174: 58-66.

114. Hatipoglu OF, Uctepe E, Opoku G, Wake H, Ikemura K, Ohtsuki T, Inagaki J, Gunduz M, Gunduz E, Watanabe S, Nishinaka T, Takahashi H, Hirohata S. Osteopontin silencing attenuates bleomycin-induced murine pulmonary fibrosis by regulating epithelial-mesenchymal transition. *Biomed Pharmacother* 2021; 139: 111633.

115. Zhang B, Lapenta K, Wang Q, Nam JH, Chung D, Robert ME, Nathanson MH, Yang X. Trefoil factor 2 secreted from damaged hepatocytes activates hepatic stellate cells to induce fibrogenesis. *J Biol Chem* 2021; 297: 100887.

116. Pannu J, Nakerakanti S, Smith E, ten Dijke P, Trojanowska M. Transforming growth factor-beta receptor type I-dependent fibrogenic gene program is mediated via activation of Smad1 and ERK1/2 pathways. *J Biol Chem* 2007; 282: 10405-10413.

117. Ahn JY, Park S, Yun YS, Song JY. Inhibition of type III TGF-β receptor aggravates lung fibrotic process. *Biomed Pharmacother* 2010; 64: 472-476.

118. Calabro NE, Barrett A, Chamorro-Jorganes A, Tam S, Kristofik NJ, Xing H, Loye AM, Sessa WC, Hansen K, Kyriakides TR. Thrombospondin-2 regulates extracellular matrix production, LOX levels, and cross-linking via downregulation of miR-29. *Matrix Biol* 2019; 82: 71-85.

119. Wu H, Chen G, Wang J, Deng M, Yuan F, Gong J. TIM-4 interference in Kupffer cells against CCL4-induced liver fibrosis by mediating Akt1/Mitophagy signalling pathway. *Cell Prolif* 2020; 53: e12731.

120. Mattila L, Airola K, Ahonen M, Hietarinta M, Black C, Saarialho-Kere U, Kähäri VM. Activation of tissue inhibitor of metalloproteinases-3 (TIMP-3) mRNA expression in scleroderma skin fibroblasts. *J Invest Dermatol* 1998; 110: 416-421.

121. Bhattacharyya S, Wang W, Morales-Nebreda L, Feng G, Wu M, Zhou X, Lafyatis R, Lee J, Hinchcliff M, Feghali-Bostwick C, Lakota K, Budinger GR, Raparia K, Tamaki Z, Varga J. Tenascin-C drives persistence of organ fibrosis. *Nat Commun* 2016; 7: 11703.

122. Park JS, Oh Y, Park YJ, Park O, Yang H, Slania S, Hummers LK, Shah AA, An HT, Jang J, Horton MR, Shin J, Dietz HC, Song E, Na DH, Park EJ, Kim K, Lee KC, Roschke VV, Hanes J, Pomper MG, Lee S. Targeting of dermal myofibroblasts through death receptor 5 arrests fibrosis in mouse models of scleroderma. *Nat Commun* 2019; 10: 1128.

123. Zhong F, Chen Z, Zhang L, Xie Y, Nair V, Ju W, Kretzler M, Nelson RG, Li Z, Chen H, Wang Y, Zhang A, Lee K, Liu Z, He JC. Tyro3 is a podocyte protective factor in glomerular disease. *JCI Insight* 2018; 3.

124. Guo Q, Furuta K, Islam S, Caporarello N, Kostallari E, Dielis K, Tschumperlin DJ, Hirsova P, Ibrahim SH. Liver sinusoidal endothelial cell expressed vascular cell adhesion molecule 1 promotes liver fibrosis. *Front Immunol* 2022; 13: 983255.

125. Wang J, Lv G, Hou W, Chen G, Cai X, Cao Y, Wang Y, Luo H, Wang D. STAT5/VCAN/PI3K signaling pathway promotes fibroblast activation and lung fibrosis. *Cell Signal* 2025; 134: 111970.

126. Ando M, Miyazaki E, Ito T, Hiroshige S, Nureki SI, Ueno T, Takenaka R, Fukami T, Kumamoto T. Significance of serum vascular endothelial growth factor level in patients with idiopathic pulmonary fibrosis. *Lung* 2010; 188: 247-252.

127. Murray LA, Habiel DM, Hohmann M, Camelo A, Shang H, Zhou Y, Coelho AL, Peng X, Gulati M, Crestani B, Sleeman MA, Mustelin T, Moore MW, Ryu C, Osafo-Addo AD, Elias JA, Lee CG, Hu B, Herazo-Maya JD, Knight DA, Hogaboam CM, Herzog EL. Antifibrotic role of vascular endothelial growth factor in pulmonary fibrosis. *JCI Insight* 2017; 2.

128. El-Chemaly S, Pacheco-Rodriguez G, Malide D, Meza-Carmen V, Kato J, Cui Y, Padilla PI, Samidurai A, Gochuico BR, Moss J. Nuclear localization of vascular endothelial growth factor-D and regulation of c-Myc-dependent transcripts in human lung fibroblasts. *Am J Respir Cell Mol Biol* 2014; 51: 34-42.

129. LeBleu VS, Teng Y, O'Connell JT, Charytan D, Müller GA, Müller CA, Sugimoto H, Kalluri R. Identification of human epididymis protein-4 as a fibroblast-derived mediator of fibrosis. *Nat Med* 2013; 19: 227-231.
